# Supplementary material for: SUMO pathway inhibition targets an aggressive pancreatic cancer subtype
Source: HighWire-hosted journal article supplement (doi:10.1136/gutjnl-2018-317856), 2020-01-30
Supplement: gutjnl-2018-317856supp005_data_supplement.xls [file gutjnl-2018-317856supp005_data_supplement.xls]

## Sheet: Sheet1
GeneTrail2
Statistical analysis of molecular signatures
finalSumoSettingHighLowOrdered.gsea.zip
miRWalk_-_Predicted_targets_-_Promotor
Type	Name	Number of hits	Expected score	Adjusted p-value
mirDB_-_Predicted_targets_-_score_greater_than_70
Type	Name	Number of hits	Expected score	Adjusted p-value
depleted	hsa-miR-218-5p	497	0	0.00358633
depleted	hsa-miR-511-5p	519	0	0.0414024
ConsensusPathDB_-_INOH
Type	Name	Number of hits	Expected score	Adjusted p-value
enriched	IL-1 NFkB	55	0	2.98488e-11
enriched	TLR NFkB	60	0	4.58507e-11
enriched	TLR p38	55	0	9.68819e-11
enriched	IL-1 JNK	53	0	5.30578e-10
enriched	IL-1 p38	57	0	5.30578e-10
enriched	TLR JNK	54	0	1.09048e-09
enriched	DroToll-like	57	0	1.02763e-08
enriched	TNF	61	0	2.24685e-08
enriched	Notch	72	0	8.44234e-07
enriched	Hedgehog	64	0	3.09376e-06
enriched	B cell receptor signaling	77	0	3.54158e-06
enriched	Wnt Canonical	98	0	3.53894e-05
enriched	Wnt Mammals	98	0	3.53894e-05
enriched	CD4 T cell receptor signaling	111	0	9.46972e-05
enriched	TGF-beta super family signaling pathway canonical	92	0	0.000140888
enriched	CD4 T cell receptor signaling-NFkB cascade	79	0	0.000230991
enriched	JAK STAT pathway and regulation	254	0	0.00103683
enriched	Citrate cycle	27	0	0.0013994
enriched	Glycolysis Gluconeogenesis	34	0	0.00410941
enriched	Pentose phosphate cycle	19	0	0.0142338
enriched	Galactose metabolism	13	0	0.033743
enriched	insulin Mam	76	0	0.0380497
enriched	EGF	27	0	0.0478085
miRWalk_-_Predicted_targets_-_CDS
Type	Name	Number of hits	Expected score	Adjusted p-value
TRANSFAC_-_Transcription_factor_families_-_Validated_targets
Type	Name	Number of hits	Expected score	Adjusted p-value
EpiFactors_-_Functions
Type	Name	Number of hits	Expected score	Adjusted p-value
GO_-_Cellular_Component
Type	Name	Number of hits	Expected score	Adjusted p-value
enriched	large ribosomal subunit(5)	76	0	6.71391e-18
enriched	proteasome complex(4)	66	0	8.19232e-18
enriched	mitochondrial protein complex(4)	115	0	3.1285e-14
enriched	chromosome centromeric region(6)	154	0	5.54726e-14
enriched	small ribosomal subunit(5)	50	0	5.06487e-13
enriched	mitochondrial membrane part(3)	137	0	5.11449e-13
enriched	proteasome regulatory particle(4)	19	0	9.86222e-13
enriched	proteasome accessory complex(4)	22	0	2.15306e-12
enriched	cytosolic large ribosomal subunit(6)	48	0	6.86306e-12
enriched	inner mitochondrial membrane protein complex(4)	87	0	8.97506e-12
enriched	catalytic step 2 spliceosome(6)	78	0	3.2328e-11
depleted	ion channel complex(5)	183	0	3.78904e-11
enriched	kinetochore(4)	108	0	4.41546e-11
enriched	spliceosomal complex(5)	148	0	8.34534e-11
enriched	respiratory chain(3)	60	0	9.76864e-10
enriched	organellar ribosome(3)&mitochondrial ribosome(4)	58	0	9.78628e-10
enriched	preribosome(5)	41	0	1.09482e-09
enriched	condensed chromosome centromeric region(7)	89	0	5.6925e-09
enriched	RNA polymerase complex(4)	113	0	8.55292e-09
enriched	condensed chromosome kinetochore(5)	81	0	1.01998e-08
enriched	DNA directed RNA polymerase complex(5)&nuclear DNA directed RNA polymerase complex(5)	112	0	1.17863e-08
enriched	cytosolic small ribosomal subunit(6)	28	0	1.17863e-08
enriched	mitochondrial respiratory chain(4)	56	0	1.42667e-08
depleted	cation channel complex(6)	117	0	3.31936e-08
enriched	nucleolar part(5)	50	0	3.6673e-08
enriched	respiratory chain complex(4)	49	0	6.59092e-08
enriched	proteasome core complex(4)	16	0	7.67872e-08
enriched	proteasome regulatory particle base subcomplex(4)	12	0	7.67872e-08
enriched	midbody(3)	114	0	1.08278e-07
enriched	mitochondrial outer membrane(5)	129	0	4.41203e-07
enriched	oxidoreductase complex(3)	84	0	9.0138e-07
enriched	small subunit processome(6)	29	0	9.0138e-07
enriched	spindle pole(5)	104	0	1.09812e-06
enriched	organelle outer membrane(4)	146	0	1.86623e-06
enriched	DNA directed RNA polymerase II holoenzyme(6)	90	0	3.39652e-06
enriched	pigment granule(6)&melanosome(7)	91	0	3.39652e-06
enriched	outer membrane(3)	151	0	3.588e-06
enriched	small nuclear ribonucleoprotein complex(5)	52	0	6.96686e-06
enriched	spliceosomal snRNP complex(6)	45	0	1.01904e-05
enriched	NADH dehydrogenase complex(4)&respiratory chain complex I(4)&mitochondrial respiratory chain complex I(5)	36	0	1.5269e-05
enriched	ubiquitin ligase complex(4)	227	0	1.53497e-05
enriched	organellar large ribosomal subunit(4)&mitochondrial large ribosomal subunit(5)	27	0	1.57765e-05
enriched	nuclear pore(5)	65	0	4.48076e-05
enriched	eukaryotic translation initiation factor 3 complex(4)	15	0	4.53869e-05
enriched	translation preinitiation complex(5)	15	0	4.53869e-05
enriched	nucleoid(2)&mitochondrial nucleoid(3)	38	0	4.6898e-05
enriched	proteasome core complex alpha subunit complex(4)	7	0	5.94918e-05
enriched	nuclear chromosome telomeric region(6)	57	0	6.65655e-05
enriched	carboxy terminal domain protein kinase complex(5)	21	0	8.45874e-05
enriched	organellar small ribosomal subunit(4)&mitochondrial small ribosomal subunit(5)	21	0	8.45874e-05
enriched	endoplasmic reticulum Golgi intermediate compartment(5)	83	0	8.93825e-05
enriched	eukaryotic 43S preinitiation complex(6)	14	0	0.000101928
enriched	eukaryotic 48S preinitiation complex(6)	14	0	0.000101928
enriched	replication fork(5)	56	0	0.000125969
enriched	cytosolic proteasome complex(5)	11	0	0.00023109
enriched	90S preribosome(6)	18	0	0.000251997
enriched	precatalytic spliceosome(6)	16	0	0.000290862
enriched	zona pellucida receptor complex(4)	8	0	0.000293835
enriched	organelle envelope lumen(3)	67	0	0.000313739
depleted	calcium channel complex(7)	46	0	0.0004783
depleted	potassium channel complex(7)	58	0	0.000497595
depleted	voltage gated potassium channel complex(5)	58	0	0.000497595
enriched	mitochondrial intermembrane space(4)	60	0	0.000574683
depleted	voltage gated sodium channel complex(5)	11	0	0.000748735
enriched	proton transporting two sector ATPase complex(4)	37	0	0.00078106
enriched	small nucleolar ribonucleoprotein complex(5)	18	0	0.00090575
enriched	viral nucleocapsid(3)	26	0	0.000936666
enriched	integral component of organelle membrane(4)	224	0	0.00110639
enriched	protein DNA complex(3)	88	0	0.0011165
enriched	condensed nuclear chromosome(6)	64	0	0.00143807
depleted	postsynaptic membrane(4)	138	0	0.00144537
enriched	intermediate filament(4)	56	0	0.00176383
depleted	postsynapse(3)	264	0	0.00185444
enriched	intermediate filament cytoskeleton(6)	93	0	0.00231737
enriched	keratin filament(5)	19	0	0.00239032
enriched	SMN Sm protein complex(4)	10	0	0.00243566
enriched	U12 type spliceosomal complex(6)	20	0	0.00266507
enriched	nuclear speck(7)	177	0	0.00304436
depleted	synaptic membrane(3)	180	0	0.00304436
depleted	voltage gated calcium channel complex(5)	30	0	0.00312342
enriched	mitochondrial proton transporting ATP synthase complex(5)	17	0	0.0032442
enriched	VCP NPL4 UFD1 AAA ATPase complex(4)	7	0	0.00330246
enriched	nuclear replication fork(6)	33	0	0.00330246
enriched	intrinsic component of mitochondrial membrane(4)	42	0	0.00331581
enriched	intrinsic component of organelle membrane(3)	236	0	0.00331581
enriched	vesicle coat(5)	45	0	0.00331581
enriched	spliceosomal tri snRNP complex(7)	18	0	0.00383517
enriched	endoplasmic reticulum Golgi intermediate compartment membrane(5)	44	0	0.00383652
enriched	ribonucleoprotein granule(5)	117	0	0.00403384
enriched	SUMO activating enzyme complex(5)	2	0	0.00422945
enriched	RNA polymerase II transcription factor complex(6)	83	0	0.00459069
depleted	perikaryon(4)	57	0	0.00481783
enriched	mitotic spindle(6)	47	0	0.0048779
enriched	DNA packaging complex(4)	40	0	0.0049368
enriched	proton transporting two sector ATPase complex catalytic domain(4)	14	0	0.00526598
enriched	cell division site(3)&cell division site part(3)	45	0	0.00551579
enriched	integral component of mitochondrial membrane(5)	41	0	0.00554129
enriched	methyltransferase complex(4)	78	0	0.00563745
enriched	spindle microtubule(5)	48	0	0.0060232
enriched	cell surface furrow(3)&cleavage furrow(4)	40	0	0.0077856
depleted	occluding junction(4)	96	0	0.0077856
enriched	nuclear ubiquitin ligase complex(5)	34	0	0.00984466
enriched	DNA replication factor C complex(4)	6	0	0.0102746
enriched	cytoplasmic ribonucleoprotein granule(5)	111	0	0.0102746
enriched	proton transporting ATP synthase complex(4)	18	0	0.0102746
enriched	COPI coated vesicle membrane(5)	16	0	0.0112048
enriched	condensed chromosome outer kinetochore(4)	13	0	0.0118973
depleted	bicellular tight junction(5)	95	0	0.0121728
enriched	viral capsid(3)	29	0	0.012338
enriched	U2 snRNP(7)	16	0	0.0127785
depleted	apical plasma membrane(4)	223	0	0.0128265
enriched	transcription elongation factor complex(4)	41	0	0.0134896
enriched	virion part(2)	31	0	0.0134896
enriched	virion(2)	31	0	0.0134896
enriched	holo TFIIH complex(6)	12	0	0.0137451
enriched	Cajal body(7)	44	0	0.0147951
enriched	gamma tubulin complex(4)	17	0	0.0147951
enriched	integral component of endoplasmic reticulum membrane(4)	110	0	0.0147951
enriched	nuclear transcription factor complex(5)	106	0	0.0153213
enriched	COP9 signalosome(4)	31	0	0.0154679
enriched	COPI coated vesicle(6)	20	0	0.0157221
enriched	Golgi associated vesicle(5)	64	0	0.0173925
depleted	axon part(4)	141	0	0.0173925
enriched	nucleotide excision repair complex(5)	11	0	0.0173925
enriched	Golgi associated vesicle membrane(4)	38	0	0.0194732
enriched	nuclear chromatin(4)	222	0	0.0196175
enriched	oligosaccharyltransferase complex(4)	10	0	0.0196175
enriched	microtubule organizing center part(5)	126	0	0.0197929
depleted	sodium channel complex(7)	14	0	0.0197929
enriched	nuclear membrane(4)	233	0	0.0199051
enriched	protein serine threonine phosphatase complex(3)&phosphatase complex(5)	40	0	0.0201997
enriched	serine threonine protein kinase complex(8)	52	0	0.0206729
depleted	Golgi lumen(5)	58	0	0.021129
depleted	apical junction complex(4)	110	0	0.021129
depleted	A band(4)	23	0	0.0219598
enriched	MCM complex(4)	11	0	0.0219598
depleted	postsynaptic density(3)	153	0	0.0224071
enriched	U4 U6 x U5 tri snRNP complex(8)	15	0	0.0233681
enriched	ER membrane protein complex(4)	10	0	0.0243343
enriched	anaphase promoting complex(6)	19	0	0.0260531
enriched	Prp19 complex(4)	12	0	0.0261222
enriched	SMN complex(4)	7	0	0.0264178
depleted	T cell receptor complex(5)	16	0	0.0264178
enriched	cytoplasmic mRNA processing body(6)	57	0	0.0264178
enriched	exosome RNase complex (4)	18	0	0.0264452
enriched	preribosome small subunit precursor(6)	6	0	0.0264452
enriched	DNA directed RNA polymerase III complex(6)	17	0	0.0284815
enriched	U5 snRNP(7)	12	0	0.0320478
depleted	spherical high density lipoprotein particle(5)	5	0	0.0333865
enriched	coated membrane(3)&membrane coat(4)	81	0	0.0335076
enriched	histone methyltransferase complex(5)	66	0	0.0339797
enriched	intrinsic component of endoplasmic reticulum membrane(4)	115	0	0.0339797
depleted	neuronal postsynaptic density(4)	58	0	0.0349392
enriched	cytochrome complex(4)	13	0	0.035322
enriched	nucleosome(4)	34	0	0.0357179
enriched	cyclin dependent protein kinase activating kinase holoenzyme complex(6)	6	0	0.0360878
enriched	endolysosome membrane(5)	9	0	0.0371397
enriched	methylosome(5)	6	0	0.0401338
enriched	spindle pole centrosome(6)	8	0	0.0434333
enriched	site of double strand break(5)	27	0	0.0435601
enriched	DNA directed RNA polymerase I complex(6)	13	0	0.0444798
enriched	TORC1 complex(4)	7	0	0.0469033
enriched	nuclear heterochromatin(5)	33	0	0.047633
depleted	M band(4)	18	0	0.0485636
enriched	Arp2 3 protein complex(4)	9	0	0.0497506
miRWalk_-_Predicted_targets_-_3-UTR
Type	Name	Number of hits	Expected score	Adjusted p-value
NIA_-_Phenotypes
Type	Name	Number of hits	Expected score	Adjusted p-value
SMPDB_-_Pathways
Type	Name	Number of hits	Expected score	Adjusted p-value
depleted	Clopidogrel Action Pathway	5	0	0.00106262
depleted	Clopidogrel Metabolism Pathway	5	0	0.00106262
enriched	Warburg Effect	39	0	0.00161866
depleted	Methadone Action Pathway	24	0	0.00191923
depleted	Fluoxetine Action Pathway	23	0	0.00328828
depleted	Nicotine Action Pathway	25	0	0.00328828
depleted	3-Methylthiofentanyl Action Pathway	19	0	0.00613896
depleted	Alfentanil Action Pathway	19	0	0.00613896
depleted	Alvimopan Action Pathway	19	0	0.00613896
depleted	Anileridine Action Pathway	19	0	0.00613896
depleted	Benzocaine Action Pathway	19	0	0.00613896
depleted	Bupivacaine Action Pathway	19	0	0.00613896
depleted	Buprenorphine Action Pathway	19	0	0.00613896
depleted	Carfentanil Action Pathway	19	0	0.00613896
depleted	Chloroprocaine Action Pathway	19	0	0.00613896
depleted	Cocaine Action Pathway	19	0	0.00613896
depleted	Codeine Action Pathway	21	0	0.00613896
depleted	Desipramine Action Pathway	20	0	0.00613896
depleted	Dezocine Action Pathway	19	0	0.00613896
depleted	Dibucaine Action Pathway	19	0	0.00613896
depleted	Dihydromorphine Action Pathway	19	0	0.00613896
depleted	Dimethylthiambutene Action Pathway	19	0	0.00613896
depleted	Diphenoxylate Action Pathway	19	0	0.00613896
depleted	Escitalopram Action Pathway	19	0	0.00613896
depleted	Ethylmorphine Action Pathway	19	0	0.00613896
depleted	Fentanyl Action Pathway	19	0	0.00613896
depleted	Glibenclamide Action Pathway	6	0	0.00613896
depleted	Gliclazide Action Pathway	6	0	0.00613896
depleted	Heroin Action Pathway	22	0	0.00613896
depleted	Hydrocodone Action Pathway	19	0	0.00613896
depleted	Hydromorphone Action Pathway	19	0	0.00613896
depleted	Imipramine Action Pathway	21	0	0.00613896
depleted	Ketobemidone Action Pathway	19	0	0.00613896
depleted	Levallorphan Action Pathway	19	0	0.00613896
depleted	Levobupivacaine Action Pathway	19	0	0.00613896
depleted	Levomethadyl Acetate Action Action Pathway	19	0	0.00613896
depleted	Levorphanol Action Pathway	19	0	0.00613896
depleted	Lidocaine (Local Anaesthetic) Action Pathway	19	0	0.00613896
depleted	Mepivacaine Action Pathway	19	0	0.00613896
depleted	Methadyl Acetate Action Pathway	19	0	0.00613896
depleted	Nalbuphine Action Pathway	20	0	0.00613896
depleted	Naloxone Action Pathway	19	0	0.00613896
depleted	Naltrexone Action Pathway	19	0	0.00613896
depleted	Nateglinide Action Pathway	6	0	0.00613896
depleted	Oxybuprocaine Action Pathway	19	0	0.00613896
depleted	Oxycodone Action Pathway	19	0	0.00613896
depleted	Oxymorphone Action Pathway	19	0	0.00613896
depleted	Pancreas Function	6	0	0.00613896
depleted	Pentazocine Action Pathway	19	0	0.00613896
depleted	Prilocaine Action Pathway	19	0	0.00613896
depleted	Procaine Action Pathway	19	0	0.00613896
depleted	Proparacaine Action Pathway	19	0	0.00613896
depleted	Propoxyphene Action Pathway	19	0	0.00613896
depleted	Remifentanil Action Pathway	19	0	0.00613896
depleted	Repaglinide Action Pathway	6	0	0.00613896
depleted	Ropivacaine Action Pathway	19	0	0.00613896
depleted	Sufentanil Action Pathway	19	0	0.00613896
depleted	Tramadol Action Action Pathway	19	0	0.00613896
enriched	2-ketoglutarate dehydrogenase complex deficiency	19	0	0.0080133
enriched	Citric Acid Cycle	19	0	0.0080133
enriched	Congenital lactic acidosis	19	0	0.0080133
enriched	Fumarase deficiency	19	0	0.0080133
enriched	Mitochondrial complex II deficiency	19	0	0.0080133
enriched	Pyruvate dehydrogenase deficiency (E2)	19	0	0.0080133
enriched	Pyruvate dehydrogenase deficiency (E3)	19	0	0.0080133
enriched	AICA-Ribosiduria	33	0	0.011526
enriched	Adenine phosphoribosyltransferase deficiency (APRT)	33	0	0.011526
enriched	Adenosine Deaminase Deficiency	33	0	0.011526
enriched	Adenylosuccinate Lyase Deficiency	33	0	0.011526
enriched	Gout or Kelley-Seegmiller Syndrome	33	0	0.011526
enriched	Lesch-Nyhan Syndrome (LNS)	33	0	0.011526
enriched	Mitochondrial DNA depletion syndrome	33	0	0.011526
enriched	Molybdenum Cofactor Deficiency	33	0	0.011526
enriched	Myoadenylate deaminase deficiency	33	0	0.011526
enriched	Purine Metabolism	33	0	0.011526
enriched	Purine Nucleoside Phosphorylase Deficiency	33	0	0.011526
depleted	Trehalose Degradation	11	0	0.011526
enriched	Xanthine Dehydrogenase Deficiency (Xanthinuria)	33	0	0.011526
enriched	Xanthinuria type I	33	0	0.011526
enriched	Xanthinuria type II	33	0	0.011526
depleted	Citalopram Action Pathway	25	0	0.0158681
enriched	Gluconeogenesis	18	0	0.0203899
enriched	Glycogen Storage Disease Type 1A (GSD1A) or Von Gierke Disease	18	0	0.0203899
enriched	Phosphoenolpyruvate carboxykinase deficiency 1 (PEPCK1)	18	0	0.0203899
enriched	Triosephosphate isomerase	18	0	0.0203899
enriched	Fatty Acid Elongation In Mitochondria	6	0	0.0238808
enriched	Long-chain-3-hydroxyacyl-coa dehydrogenase deficiency (LCHAD)	6	0	0.0238808
depleted	Nevirapine Metabolism Pathway	7	0	0.0304186
enriched	Glucose-6-phosphate dehydrogenase deficiency	12	0	0.0396911
enriched	Pentose Phosphate Pathway	12	0	0.0396911
enriched	Ribose-5-phosphate isomerase deficiency	12	0	0.0396911
enriched	Transaldolase deficiency	12	0	0.0396911
NCI_-_Pathway_Interaction_Database
Type	Name	Number of hits	Expected score	Adjusted p-value
enriched	Validated targets of C-MYC transcriptional activation	72	0	5.8951e-06
enriched	Direct p53 effectors	124	0	0.000176102
enriched	ATR signaling pathway	36	0	0.000351743
enriched	FOXM1 transcription factor network	37	0	0.000351743
enriched	p73 transcription factor network	69	0	0.000351743
enriched	PLK1 signaling events	38	0	0.000426215
enriched	Fanconi anemia pathway	43	0	0.00093434
enriched	Aurora B signaling	36	0	0.00106895
enriched	a6b1 and a6b4 Integrin signaling	42	0	0.00106895
enriched	BARD1 signaling events	26	0	0.00208523
enriched	Lissencephaly gene (LIS1) in neuronal migration and development	27	0	0.00309345
enriched	Alpha6 beta4 integrin-ligand interactions	11	0	0.00341478
enriched	Aurora A signaling	30	0	0.00341478
enriched	Integrin-linked kinase signaling	44	0	0.00391614
depleted	FOXA2 and FOXA3 transcription factor networks	34	0	0.00415829
enriched	Signaling events mediated by PRL	22	0	0.0121063
enriched	Beta3 integrin cell surface interactions	38	0	0.0151461
enriched	Ceramide signaling pathway	39	0	0.0151461
enriched	mTOR signaling pathway	63	0	0.0192261
enriched	Arf1 pathway	19	0	0.0211807
enriched	p53 pathway	52	0	0.0288131
enriched	Validated transcriptional targets of AP1 family members Fra1 and Fra2	34	0	0.0435168
enriched	ErbB1 downstream signaling	98	0	0.0443957
enriched	Urokinase-type plasminogen activator (uPA) and uPAR-mediated signaling	33	0	0.0479272
CORUM_-_Protein_complexes
Type	Name	Number of hits	Expected score	Adjusted p-value
WikiPathways
Type	Name	Number of hits	Expected score	Adjusted p-value
enriched	Cytoplasmic Ribosomal Proteins	72	0	3.64088e-19
enriched	Proteasome Degradation	57	0	1.32708e-16
enriched	Electron Transport Chain	68	0	5.07589e-11
enriched	Retinoblastoma (RB) in Cancer	83	0	9.50934e-11
enriched	mRNA Processing	113	0	6.02667e-10
enriched	Cell Cycle	96	0	1.04894e-09
enriched	Oxidative phosphorylation	45	0	7.04312e-09
enriched	DNA Replication	38	0	7.96983e-09
enriched	Parkin-Ubiquitin Proteasomal System pathway	61	0	4.80557e-08
enriched	Eukaryotic Transcription Initiation	40	0	2.84694e-07
enriched	Translation Factors	45	0	8.44841e-07
enriched	Glycolysis and Gluconeogenesis	37	0	8.27198e-06
enriched	Nucleotide Metabolism	19	0	2.28328e-05
enriched	Mismatch repair	9	0	4.60917e-05
enriched	Cori Cycle	14	0	0.000188789
enriched	Integrated Breast Cancer Pathway	140	0	0.000472678
enriched	DNA Damage Response	62	0	0.000913671
depleted	Metapathway biotransformation	125	0	0.000913671
enriched	TNF alpha Signaling Pathway	84	0	0.000913671
enriched	miRNA Regulation of DNA Damage Response	65	0	0.000913671
enriched	G1 to S cell cycle control	65	0	0.00140735
depleted	Tamoxifen metabolism	16	0	0.00221971
enriched	TGF-beta Signaling Pathway	118	0	0.00323886
enriched	Integrated Cancer Pathway	43	0	0.00632893
enriched	Pathogenic Escherichia coli infection	45	0	0.00816325
enriched	Regulation of toll-like receptor signaling pathway	106	0	0.00816325
enriched	Apoptosis-related network due to altered Notch3 in ovarian cancer	50	0	0.0123817
depleted	Constitutive Androstane Receptor Pathway	27	0	0.0132293
enriched	Focal Adhesion	172	0	0.0135949
depleted	GPCRs, Class A Rhodopsin-like	96	0	0.0135949
enriched	Gastric Cancer Network 2	29	0	0.0135949
enriched	TWEAK Signaling Pathway	40	0	0.0135949
enriched	Structural Pathway of Interleukin 1 (IL-1)	42	0	0.0149381
enriched	p38 MAPK Signaling Pathway	31	0	0.0162197
depleted	Nuclear Receptors	32	0	0.020653
depleted	Diclofenac Metabolic Pathway	4	0	0.022985
enriched	Oncostatin M Signaling Pathway	64	0	0.0236815
enriched	Selenium Micronutrient Network	72	0	0.0236815
enriched	Senescence and Autophagy in Cancer	88	0	0.0236815
enriched	EBV LMP1 signaling	17	0	0.027657
depleted	Fatty Acid Omega Oxidation	7	0	0.027657
enriched	IL-1 signaling pathway	47	0	0.027657
enriched	TCA Cycle	15	0	0.027657
enriched	Interleukin-11 Signaling Pathway	40	0	0.0276906
enriched	Primary Focal Segmental Glomerulosclerosis FSGS	63	0	0.0276906
enriched	Apoptosis Modulation and Signaling	82	0	0.0439581
enriched	Glycogen Metabolism	32	0	0.0450439
enriched	Integrated Pancreatic Cancer Pathway	169	0	0.046037
enriched	ATM Signaling Pathway	37	0	0.0484464
enriched	Alpha 6 Beta 4 signaling pathway	33	0	0.0484464
miRWalk_-_Validated_targets
Type	Name	Number of hits	Expected score	Adjusted p-value
EpiFactors_-_Protein_complexes
Type	Name	Number of hits	Expected score	Adjusted p-value
SignaLink_-_Transcription_Factors
Type	Name	Number of hits	Expected score	Adjusted p-value
EpiFactors_-_Target_entities
Type	Name	Number of hits	Expected score	Adjusted p-value
ConsensusPathDB_-_Reactome
Type	Name	Number of hits	Expected score	Adjusted p-value
enriched	Cell Cycle	410	0	1.05451e-33
enriched	Metabolism of proteins	575	0	6.21869e-33
enriched	Translation	127	0	1.06161e-32
enriched	Cell Cycle, Mitotic	352	0	8.63777e-32
enriched	GTP hydrolysis and joining of the 60S ribosomal subunit	89	0	3.5834e-28
enriched	Cap-dependent Translation Initiation	94	0	8.03534e-28
enriched	Eukaryotic Translation Initiation	94	0	8.03534e-28
enriched	3, -UTR-mediated translational regulation	88	0	9.41101e-27
enriched	L13a-mediated translational silencing of Ceruloplasmin expression	88	0	9.41101e-27
enriched	Formation of a pool of free 40S subunits	80	0	3.61038e-26
enriched	SRP-dependent cotranslational protein targeting to membrane	91	0	5.69462e-24
enriched	Eukaryotic Translation Elongation	74	0	1.26979e-22
enriched	Eukaryotic Translation Termination	69	0	5.37359e-22
enriched	Nonsense Mediated Decay (NMD) independent of the Exon Junction Complex (EJC)	74	0	1.89527e-21
enriched	M Phase	195	0	2.15121e-21
enriched	Peptide chain elongation	70	0	3.38083e-21
enriched	Nonsense Mediated Decay (NMD) enhanced by the Exon Junction Complex (EJC)	83	0	2.04174e-19
enriched	Nonsense-Mediated Decay (NMD)	83	0	2.04174e-19
enriched	Transcription	171	0	1.6575e-18
enriched	Mitotic Metaphase and Anaphase	120	0	7.58526e-18
enriched	Mitotic Anaphase	119	0	1.47069e-17
enriched	Processing of Capped Intron-Containing Pre-mRNA	128	0	2.66116e-17
enriched	Separation of Sister Chromatids	108	0	1.18013e-16
enriched	Mitotic Prometaphase	99	0	2.05341e-16
enriched	mRNA Splicing	99	0	2.05341e-16
enriched	mRNA Splicing - Major Pathway	99	0	2.05341e-16
enriched	Ribosomal scanning and start codon recognition	46	0	3.6073e-16
enriched	Late Phase of HIV Life Cycle	119	0	1.2834e-15
enriched	Cellular responses to stress	288	0	1.51758e-15
enriched	Mitochondrial translation elongation	67	0	1.72701e-15
enriched	Mitochondrial translation termination	67	0	1.72701e-15
enriched	HIV Life Cycle	131	0	1.82887e-15
enriched	Mitochondrial translation	73	0	1.82887e-15
enriched	Activation of the mRNA upon binding of the cap-binding complex and eIFs, and subsequent binding to 43S	47	0	2.53971e-15
enriched	Formation of the ternary complex, and subsequently, the 43S complex	40	0	3.48112e-15
enriched	Infectious disease	220	0	3.5578e-15
enriched	Translation initiation complex formation	46	0	6.13869e-15
enriched	Cell Cycle Checkpoints	100	0	7.34464e-15
enriched	HIV Infection	164	0	8.33149e-15
enriched	S Phase	72	0	3.55441e-14
enriched	Resolution of Sister Chromatid Cohesion	91	0	4.20269e-14
enriched	DNA Repair	136	0	1.08994e-13
enriched	Mitochondrial translation initiation	67	0	1.38205e-13
enriched	RHO GTPase Effectors	221	0	1.94635e-12
enriched	DNA Replication	52	0	2.08943e-12
enriched	RHO GTPases Activate Formins	104	0	2.6211e-12
depleted	Generic Transcription Pathway	453	0	2.74271e-12
enriched	RNA Polymerase II Transcription	92	0	4.31907e-12
enriched	G2/M Checkpoints	75	0	4.54122e-12
enriched	The citric acid (TCA) cycle and respiratory electron transport	116	0	5.29717e-12
enriched	Protein folding	49	0	2.66494e-11
enriched	Synthesis of DNA	48	0	2.66494e-11
enriched	Disease	388	0	3.87978e-11
enriched	Organelle biogenesis and maintenance	250	0	8.32688e-11
enriched	Respiratory electron transport, ATP synthesis by chemiosmotic coupling, and heat production by uncoupling proteins.	80	0	1.21759e-10
enriched	Chromosome Maintenance	65	0	4.5576e-10
enriched	Chaperonin-mediated protein folding	43	0	6.37307e-10
enriched	G1/S Transition	52	0	1.01752e-09
enriched	Cooperation of Prefoldin and TriC/CCT in actin and tubulin folding	24	0	1.45065e-09
enriched	mRNA Splicing - Minor Pathway	35	0	3.0936e-09
enriched	Metabolism of nucleotides	69	0	3.63408e-09
enriched	DNA strand elongation	31	0	4.14382e-09
enriched	Prefoldin mediated transfer of substrate to CCT/TriC	23	0	5.32412e-09
enriched	Transcription of the HIV genome	61	0	5.55614e-09
enriched	Telomere Maintenance	42	0	8.05789e-09
enriched	Formation of HIV-1 elongation complex containing HIV-1 Tat	41	0	9.65559e-09
enriched	HIV Transcription Elongation	41	0	9.65559e-09
enriched	RNA Polymerase I, RNA Polymerase III, and Mitochondrial Transcription	95	0	9.65559e-09
enriched	Tat-mediated elongation of the HIV-1 transcript	41	0	9.65559e-09
enriched	Respiratory electron transport	65	0	1.15979e-08
enriched	RNA Polymerase II Pre-transcription Events	59	0	1.42153e-08
enriched	Folding of actin by CCT/TriC	9	0	2.02236e-08
enriched	Influenza Infection	52	0	2.26333e-08
enriched	DNA Replication Pre-Initiation	31	0	2.62258e-08
enriched	Extension of Telomeres	27	0	2.62258e-08
enriched	M/G1 Transition	31	0	2.62258e-08
enriched	Class I MHC mediated antigen processing & presentation	191	0	2.9371e-08
enriched	Formation of HIV elongation complex in the absence of HIV Tat	42	0	3.24089e-08
enriched	Formation of RNA Pol II elongation complex	42	0	3.24089e-08
enriched	RNA Polymerase II Transcription Elongation	42	0	3.24089e-08
enriched	APC/C-mediated degradation of cell cycle proteins	34	0	1.06359e-07
enriched	Influenza Life Cycle	49	0	1.06359e-07
enriched	Regulation of mitotic cell cycle	34	0	1.06359e-07
enriched	Mitotic G2-G2/M phases	104	0	1.15832e-07
enriched	RNA Polymerase I Transcription	63	0	1.15832e-07
enriched	Mitotic G1-G1/S phases	75	0	1.23637e-07
enriched	G2/M Transition	102	0	1.38093e-07
enriched	Nucleotide Excision Repair	48	0	1.72122e-07
enriched	Cellular response to heat stress	86	0	2.12623e-07
enriched	Transcription-coupled NER (TC-NER)	43	0	2.4336e-07
enriched	Transcriptional regulation by small RNAs	54	0	2.88164e-07
enriched	RNA Polymerase I Promoter Clearance	61	0	3.17921e-07
enriched	Activation of APC/C and APC/C:Cdc20 mediated degradation of mitotic proteins	27	0	5.49699e-07
enriched	Regulation of HSF1-mediated heat shock response	70	0	8.66647e-07
enriched	Metabolism of non-coding RNA	44	0	8.90902e-07
enriched	snRNP Assembly	44	0	8.90902e-07
enriched	Regulation of APC/C activators between G1/S and early anaphase	29	0	1.00215e-06
enriched	Formation of tubulin folding intermediates by CCT/TriC	17	0	1.01757e-06
enriched	Formation of the Early Elongation Complex	32	0	1.07197e-06
enriched	Formation of the HIV-1 Early Elongation Complex	32	0	1.07197e-06
enriched	APC/C:Cdc20 mediated degradation of mitotic proteins	26	0	1.37998e-06
enriched	Cytosolic tRNA aminoacylation	22	0	1.37998e-06
enriched	Activation of ATR in response to replication stress	34	0	1.40053e-06
enriched	tRNA Aminoacylation	40	0	1.78886e-06
enriched	Epigenetic regulation of gene expression	75	0	2.01457e-06
enriched	Activation of the pre-replicative complex	26	0	2.55446e-06
enriched	HSF1 activation	25	0	2.88381e-06
enriched	RNA Polymerase I Chain Elongation	42	0	3.12835e-06
enriched	Mitochondrial protein import	46	0	3.14365e-06
enriched	Signaling by Rho GTPases	331	0	3.21338e-06
enriched	Pausing and recovery of Tat-mediated HIV elongation	29	0	3.6594e-06
enriched	Tat-mediated HIV elongation arrest and recovery	29	0	3.6594e-06
enriched	Telomere C-strand (Lagging Strand) Synthesis	22	0	5.6225e-06
enriched	Influenza Viral RNA Transcription and Replication	41	0	6.03799e-06
enriched	APC:Cdc20 mediated degradation of cell cycle proteins prior to satisfation of the cell cycle checkpoint	24	0	9.08076e-06
enriched	HIV Transcription Initiation	40	0	9.89294e-06
enriched	RNA Polymerase II HIV Promoter Escape	40	0	9.89294e-06
enriched	RNA Polymerase II Transcription Initiation	40	0	9.89294e-06
enriched	RNA Polymerase II Transcription Initiation And Promoter Clearance	40	0	9.89294e-06
enriched	RNA Polymerase II Transcription Pre-Initiation And Promoter Opening	40	0	9.89294e-06
enriched	Global Genomic NER (GG-NER)	33	0	1.04859e-05
enriched	Negative epigenetic regulation of rRNA expression	60	0	1.37877e-05
enriched	Elongation arrest and recovery	30	0	1.48126e-05
enriched	HIV elongation arrest and recovery	30	0	1.48126e-05
enriched	Pausing and recovery of HIV elongation	30	0	1.48126e-05
enriched	RNA Polymerase II Promoter Escape	39	0	1.60941e-05
enriched	Viral Messenger RNA Synthesis	39	0	1.60941e-05
enriched	mRNA Capping	28	0	2.00905e-05
enriched	APC/C:Cdh1 mediated degradation of Cdc20 and other APC/C:Cdh1 targeted proteins in late mitosis/early G1	23	0	2.1774e-05
enriched	Cdc20:Phospho-APC/C mediated degradation of Cyclin A	23	0	2.1774e-05
depleted	Biological oxidations	128	0	2.23756e-05
enriched	Host Interactions of HIV factors	78	0	2.23756e-05
enriched	Base Excision Repair	34	0	2.30485e-05
enriched	Resolution of Abasic Sites (AP sites)	34	0	2.30485e-05
enriched	Asparagine N-linked glycosylation	108	0	2.54903e-05
enriched	RNA Polymerase I Transcription Initiation	46	0	2.59131e-05
enriched	Translesion synthesis by REV1	15	0	2.77509e-05
enriched	Resolution of AP sites via the multiple-nucleotide patch replacement pathway	21	0	2.78263e-05
enriched	Mitotic Prophase	86	0	3.06605e-05
enriched	Condensation of Prometaphase Chromosomes	11	0	3.30909e-05
enriched	Lagging Strand Synthesis	20	0	3.43754e-05
depleted	Neuronal System	201	0	3.43754e-05
enriched	Senescence-Associated Secretory Phenotype (SASP)	57	0	4.12841e-05
enriched	NoRC negatively regulates rRNA expression	58	0	4.16841e-05
enriched	G2/M DNA damage checkpoint	43	0	5.21723e-05
enriched	APC-Cdc20 mediated degradation of Nek2A	22	0	5.22923e-05
enriched	Antigen processing: Ubiquitination & Proteasome degradation	148	0	5.245e-05
enriched	Cyclin A/B1 associated events during G2/M transition	19	0	5.6617e-05
enriched	Translesion synthesis by Y family DNA polymerases bypasses lesions on DNA template	35	0	5.68171e-05
enriched	Post-translational protein modification	305	0	7.63637e-05
enriched	Association of TriC/CCT with target proteins during biosynthesis	27	0	7.95089e-05
enriched	TGF-beta receptor signaling activates SMADs	31	0	8.07127e-05
enriched	RNA Pol II CTD phosphorylation and interaction with CE	26	0	8.10785e-05
enriched	Abortive elongation of HIV-1 transcript in the absence of Tat	22	0	8.16697e-05
enriched	Regulation of PLK1 Activity at G2/M Transition	73	0	0.000107688
enriched	Termination of translesion DNA synthesis	28	0	0.0001171
enriched	DNA Damage Bypass	42	0	0.000121468
enriched	SUMOylation	73	0	0.000126234
enriched	APC/C:Cdc20 mediated degradation of Cyclin B	21	0	0.000128784
enriched	TP53 Regulates Metabolic Genes	65	0	0.000130226
enriched	Transcriptional Regulation by TP53	65	0	0.000130226
enriched	Regulation of DNA replication	24	0	0.000133595
enriched	Removal of licensing factors from origins	24	0	0.000133595
enriched	Translesion synthesis by POLK	16	0	0.000142419
enriched	Translesion synthesis by POLI	16	0	0.000170491
enriched	Recognition of DNA damage by PCNA-containing replication complex	25	0	0.000172207
enriched	Cellular Senescence	125	0	0.000201196
enriched	Unwinding of DNA	11	0	0.000228872
enriched	PCNA-Dependent Long Patch Base Excision Repair	18	0	0.000249655
enriched	Cleavage of Growing Transcript in the Termination Region	33	0	0.00026094
enriched	Post-Elongation Processing of the Transcript	33	0	0.00026094
enriched	RNA Polymerase II Transcription Termination	33	0	0.00026094
enriched	Assembly of the pre-replicative complex	18	0	0.000270671
enriched	Translesion Synthesis by POLH	18	0	0.000271087
enriched	APC/C:Cdc20 mediated degradation of Securin	20	0	0.000308322
depleted	Class C/3 (Metabotropic glutamate/pheromone receptors)	13	0	0.000308322
enriched	Polo-like kinase mediated events	15	0	0.000308322
enriched	RNA Polymerase I Transcription Termination	30	0	0.000312932
enriched	Cyclin A:Cdk2-associated events at S phase entry	20	0	0.000321742
enriched	Cyclin E associated events during G1/S transition	20	0	0.000321742
enriched	Oxygen-dependent proline hydroxylation of Hypoxia-inducible Factor Alpha	16	0	0.000322353
depleted	GPCR ligand binding	219	0	0.000360676
enriched	Activated TLR4 signalling	94	0	0.000394958
enriched	MyD88-independent TLR3/TLR4 cascade	80	0	0.00047768
enriched	TRIF-mediated TLR3/TLR4 signaling	80	0	0.00047768
enriched	Toll Like Receptor 3 (TLR3) Cascade	80	0	0.00047768
enriched	Transport of Mature Transcript to Cytoplasm	49	0	0.000528366
depleted	G alpha (s) signalling events	72	0	0.000530312
enriched	Gap-filling DNA repair synthesis and ligation in GG-NER	15	0	0.000568674
enriched	Gap-filling DNA repair synthesis and ligation in TC-NER	15	0	0.000568674
enriched	Rev-mediated nuclear export of HIV RNA	31	0	0.000597807
enriched	RNA Polymerase I Promoter Escape	29	0	0.00059908
enriched	Purine metabolism	29	0	0.000614818
enriched	SUMO E3 ligases SUMOylate target proteins	69	0	0.000614818
enriched	SUMOylation of DNA damage response and repair proteins	69	0	0.000614818
enriched	Toll-Like Receptors Cascades	118	0	0.000675202
enriched	Orc1 removal from chromatin	22	0	0.0006947
enriched	Switching of origins to a post-replicative state	22	0	0.0006947
enriched	Metabolism of carbohydrates	212	0	0.00075326
enriched	Transport of Mature mRNA derived from an Intron-Containing Transcript	46	0	0.000787476
enriched	Dual incision reaction in TC-NER	28	0	0.000860759
enriched	Fanconi Anemia pathway	21	0	0.000860759
enriched	Formation of transcription-coupled NER (TC-NER) repair complex	28	0	0.000860759
enriched	Adaptive Immune System	472	0	0.000864422
enriched	Regulatory RNA pathways	74	0	0.000923655
enriched	Export of Viral Ribonucleoproteins from Nucleus	30	0	0.000955893
enriched	Deadenylation-dependent mRNA decay	45	0	0.00108291
enriched	Meiosis	23	0	0.00108291
enriched	Interactions of Rev with host cellular proteins	33	0	0.00109937
enriched	Downregulation of TGF-beta receptor signaling	25	0	0.00120504
enriched	Attenuation phase	23	0	0.00122221
enriched	Condensation of Prophase Chromosomes	25	0	0.00127944
enriched	Toll Like Receptor 4 (TLR4) Cascade	101	0	0.00128961
enriched	N-glycan trimming in the ER and Calnexin/Calreticulin cycle	13	0	0.00131448
enriched	Cellular response to hypoxia	17	0	0.0013208
enriched	Regulation of Hypoxia-inducible Factor (HIF) by oxygen	17	0	0.0013208
depleted	Potassium Channels	65	0	0.00145185
enriched	Repair synthesis for gap-filling by DNA polymerase in TC-NER	14	0	0.00154119
enriched	Repair synthesis of patch ~27-30 bases long by DNA polymerase	14	0	0.00154119
enriched	Autodegradation of Cdh1 by Cdh1:APC/C	18	0	0.0017154
enriched	Mitotic Spindle Checkpoint	18	0	0.0017154
enriched	Laminin interactions	22	0	0.001726
enriched	Gluconeogenesis	24	0	0.00173064
enriched	Interactions of Vpr with host cellular proteins	32	0	0.00174468
enriched	Calnexin/calreticulin cycle	11	0	0.00183884
enriched	Collagen formation	80	0	0.00183884
enriched	PRC2 methylates histones and DNA	26	0	0.00183884
enriched	Interleukin-1 signaling	33	0	0.00212741
enriched	Glucose metabolism	59	0	0.00222811
depleted	Interaction between L1 and Ankyrins	24	0	0.00249764
enriched	NEP/NS2 Interacts with the Cellular Export Machinery	28	0	0.00252324
depleted	Xenobiotics	12	0	0.00263093
enriched	Post-chaperonin tubulin folding pathway	15	0	0.00272659
depleted	Voltage gated Potassium channels	27	0	0.00274211
enriched	Nuclear Pore Complex (NPC) Disassembly	31	0	0.00281188
enriched	Transport of the SLBP Dependant Mature mRNA	31	0	0.00281188
enriched	Nucleotide-binding domain, leucine rich repeat containing receptor (NLR) signaling pathways	39	0	0.00326629
depleted	Phase 1 - Functionalization of compounds	53	0	0.00389061
enriched	HSF1-dependent transactivation	30	0	0.00407331
enriched	Inactivation of APC/C via direct inhibition of the APC/C complex	17	0	0.00407331
enriched	Inhibition of the proteolytic activity of APC/C required for the onset of anaphase by mitotic spindle checkpoint components	17	0	0.00407331
enriched	Phosphorylation of the APC/C	17	0	0.00407331
enriched	Meiotic synapsis	16	0	0.00409275
enriched	Transport of Ribonucleoproteins into the Host Nucleus	27	0	0.00409275
enriched	Antigen Presentation: Folding, assembly and peptide loading of class I MHC	23	0	0.00415005
depleted	Nuclear Receptor transcription pathway	44	0	0.00427823
enriched	Intrinsic Pathway for Apoptosis	35	0	0.00449251
enriched	Nuclear import of Rev protein	30	0	0.00449251
enriched	Transport of the SLBP independent Mature mRNA	30	0	0.00449251
enriched	Vpr-mediated nuclear import of PICs	30	0	0.00449251
enriched	Anchoring of the basal body to the plasma membrane	82	0	0.00456903
enriched	Chk1/Chk2(Cds1) mediated inactivation of Cyclin B:Cdk1 complex	12	0	0.00470816
enriched	Transport of Mature mRNAs Derived from Intronless Transcripts	33	0	0.00470816
enriched	Processive synthesis on the lagging strand	15	0	0.00486354
enriched	Post-Elongation Processing of Intronless pre-mRNA	16	0	0.00496737
enriched	Processing of Capped Intronless Pre-mRNA	16	0	0.00496737
enriched	Assembly of the primary cilium	157	0	0.00532625
enriched	Membrane Trafficking	147	0	0.00564019
enriched	Synthesis and interconversion of nucleotide di- and triphosphates	19	0	0.00578027
enriched	Processing and activation of SUMO	8	0	0.00578321
enriched	Formation of ATP by chemiosmotic coupling	13	0	0.00581204
enriched	mTORC1-mediated signalling	21	0	0.00581204
enriched	Telomere Extension By Telomerase	5	0	0.00616877
enriched	RNA Polymerase III Transcription Initiation From Type 1 Promoter	25	0	0.00695319
enriched	Transport of Mature mRNA Derived from an Intronless Transcript	32	0	0.00695319
enriched	SLBP Dependent Processing of Replication-Dependent Histone Pre-mRNAs	8	0	0.00708659
enriched	Apoptosis	101	0	0.00709246
enriched	RNA Polymerase III Transcription Initiation	31	0	0.00711365
enriched	MyD88:Mal cascade initiated on plasma membrane	73	0	0.00749243
enriched	Toll Like Receptor 2 (TLR2) Cascade	73	0	0.00749243
enriched	Toll Like Receptor TLR1:TLR2 Cascade	73	0	0.00749243
enriched	Toll Like Receptor TLR6:TLR2 Cascade	73	0	0.00749243
enriched	Programmed Cell Death	104	0	0.00753474
enriched	Purine ribonucleoside monophosphate biosynthesis	11	0	0.00760778
enriched	Post-Elongation Processing of Intron-Containing pre-mRNA	27	0	0.00766555
enriched	Type I hemidesmosome assembly	9	0	0.00766555
enriched	mRNA 3,-end processing	27	0	0.00766555
enriched	Vesicle-mediated transport	182	0	0.00799153
enriched	Glycolysis	24	0	0.00812649
enriched	NOD1/2 Signaling Pathway	28	0	0.00816621
enriched	Citric acid cycle (TCA cycle)	17	0	0.00817754
enriched	Ubiquitin-dependent degradation of Cyclin D	6	0	0.00854815
enriched	Ubiquitin-dependent degradation of Cyclin D1	6	0	0.00854815
enriched	SCF(Skp2)-mediated degradation of p27/p21	13	0	0.00926311
enriched	Phosphorylation of Emi1	5	0	0.00967934
enriched	HDACs deacetylate histones	43	0	0.0099963
enriched	Nuclear Envelope Breakdown	48	0	0.0099963
enriched	Signaling by TGF-beta Receptor Complex	64	0	0.0101158
enriched	Regulation of mRNA stability by proteins that bind AU-rich elements	34	0	0.0103608
enriched	RIG-I/MDA5 mediated induction of IFN-alpha/beta pathways	48	0	0.0109602
enriched	RNA Polymerase III Transcription Initiation From Type 2 Promoter	24	0	0.0110265
enriched	MyD88 dependent cascade initiated on endosome	66	0	0.0111355
enriched	Toll Like Receptor 7/8 (TLR7/8) Cascade	66	0	0.0111355
enriched	COPI Mediated Transport	10	0	0.0113929
enriched	Golgi to ER Retrograde Transport	10	0	0.0113929
enriched	Toll Like Receptor 9 (TLR9) Cascade	69	0	0.0115016
enriched	Signal transduction by L1	19	0	0.0121057
enriched	Hydroxycarboxylic acid-binding receptors	2	0	0.0125056
enriched	Leading Strand Synthesis	14	0	0.0127267
enriched	Polymerase switching	14	0	0.0127267
enriched	Polymerase switching on the C-strand of the telomere	14	0	0.0127267
enriched	Loss of Nlp from mitotic centrosomes	57	0	0.0128336
enriched	Loss of proteins required for interphase microtubule organizationfrom the centrosome	57	0	0.0128336
depleted	Phase II conjugation	70	0	0.0128336
depleted	Ethanol oxidation	7	0	0.0129981
depleted	Transmission across Chemical Synapses	149	0	0.0132799
enriched	Activation of BH3-only proteins	23	0	0.0142885
enriched	Mismatch repair (MMR) directed by MSH2:MSH6 (MutSalpha)	13	0	0.0144987
enriched	Removal of the Flap Intermediate	13	0	0.0144987
enriched	Dual incision reaction in GG-NER	20	0	0.0154067
enriched	Formation of incision complex in GG-NER	20	0	0.0154067
enriched	Macroautophagy	50	0	0.0161755
enriched	Kinesins	23	0	0.0177098
enriched	Deposition of new CENPA-containing nucleosomes at the centromere	26	0	0.0187512
enriched	Nucleosome assembly	26	0	0.0187512
enriched	MyD88 cascade initiated on plasma membrane	64	0	0.0194473
enriched	TRAF6 mediated induction of NFkB and MAP kinases upon TLR7/8 or 9 activation	64	0	0.0194473
enriched	Toll Like Receptor 10 (TLR10) Cascade	64	0	0.0194473
enriched	Toll Like Receptor 5 (TLR5) Cascade	64	0	0.0194473
enriched	Cyclin B2 mediated events	5	0	0.0199378
enriched	Endosomal Sorting Complex Required For Transport (ESCRT)	26	0	0.0199378
enriched	SLBP independent Processing of Histone Pre-mRNAs	7	0	0.0210752
enriched	SCF-beta-TrCP mediated degradation of Emi1	8	0	0.021726
enriched	Unfolded Protein Response (UPR)	14	0	0.021726
depleted	Depolarization of the Presynaptic Terminal Triggers the Opening of Calcium Channels	12	0	0.0219566
enriched	SIRT1 negatively regulates rRNA Expression	19	0	0.0222923
enriched	Glucose transport	37	0	0.0226649
depleted	Neurotransmitter Receptor Binding And Downstream Transmission In The Postsynaptic Cell	94	0	0.0229682
depleted	CYP2E1 reactions	7	0	0.0229923
depleted	Transmembrane transport of small molecules	427	0	0.023127
enriched	Hh mutants abrogate ligand secretion	10	0	0.0231728
enriched	Hh mutants that don,t undergo autocatalytic processing are degraded by ERAD	10	0	0.0231728
enriched	Meiotic recombination	13	0	0.0231728
enriched	DNA methylation	16	0	0.023818
enriched	Association of licensing factors with the pre-replicative complex	10	0	0.0239035
enriched	RNA Polymerase I Promoter Opening	16	0	0.0239523
enriched	Processive synthesis on the C-strand of the telomere	11	0	0.024237
enriched	activated TAK1 mediates p38 MAPK activation	14	0	0.0249561
enriched	Constitutive Signaling by AKT1 E17K in Cancer	24	0	0.0249787
enriched	POLB-Dependent Long Patch Base Excision Repair	7	0	0.0269249
enriched	RNA Polymerase III Chain Elongation	17	0	0.0274365
enriched	mRNA decay by 5, to 3, exoribonuclease	13	0	0.0283036
enriched	CDK-mediated phosphorylation and removal of Cdc6	5	0	0.0284047
enriched	Biosynthesis of the N-glycan precursor (dolichol lipid-linked oligosaccharide, LLO) and transfer to a nascent protein	59	0	0.0284564
enriched	RNA Polymerase III Transcription Initiation From Type 3 Promoter	25	0	0.0285742
enriched	Assembly of collagen fibrils and other multimeric structures	43	0	0.03024
enriched	Pyrimidine metabolism	18	0	0.0309711
enriched	Mitochondrial tRNA aminoacylation	21	0	0.0324347
enriched	degradation of DVL	10	0	0.0325986
enriched	TAK1 activates NFkB by phosphorylation and activation of IKKs complex	22	0	0.0336068
enriched	Centrosome maturation	65	0	0.0342159
enriched	Recruitment of mitotic centrosome proteins and complexes	65	0	0.0342159
enriched	Hexose transport	40	0	0.0348429
depleted	Cytochrome P450 - arranged by substrate type	39	0	0.0360785
enriched	RHO GTPases activate PKNs	44	0	0.0360785
enriched	Pyruvate metabolism and Citric Acid (TCA) cycle	39	0	0.0366344
enriched	SUMO is transferred from E1 to E2 (UBE2I, UBC9)	6	0	0.0380404
enriched	Mismatch Repair	14	0	0.0400736
enriched	CDT1 association with the CDC6:ORC:origin complex	12	0	0.0404974
enriched	RMTs methylate histone arginines	34	0	0.0404974
enriched	Regulation of Glucokinase by Glucokinase Regulatory Protein	28	0	0.0404974
depleted	Synthesis of (16-20)-hydroxyeicosatetraenoic acids (HETE)	6	0	0.0404974
depleted	Synthesis of epoxy (EET) and dihydroxyeicosatrienoic acids (DHET)	6	0	0.0404974
enriched	KSRP destabilizes mRNA	15	0	0.0428734
enriched	G2/M DNA replication checkpoint	5	0	0.043715
enriched	Budding and maturation of HIV virion	24	0	0.0443634
enriched	EGFR downregulation	26	0	0.0455439
enriched	TRAF6 Mediated Induction of proinflammatory cytokines	54	0	0.047776
depleted	Acetylcholine regulates insulin secretion	9	0	0.0479893
ConsensusPathDB_-_NetPath
Type	Name	Number of hits	Expected score	Adjusted p-value
enriched	TNFalpha	213	0	5.8628e-14
enriched	EGFR1	425	0	3.92237e-09
enriched	AndrogenReceptor	135	0	0.00125822
enriched	TGF beta Receptor	155	0	0.01159
enriched	Fibroblast growth factor-1	71	0	0.033251
enriched	IL1	48	0	0.033251
enriched	TWEAK	28	0	0.0345483
enriched	IL2	67	0	0.0385566
HG19_GRCh38_-_Chromosome
Type	Name	Number of hits	Expected score	Adjusted p-value
enriched	chr20	401	0	4.45918e-06
depleted	chr13	241	0	1.22775e-05
depleted	chrY	30	0	0.000990967
depleted	chr21	149	0	0.0046673
enriched	chr22	351	0	0.0344559
mirDB_-_Predicted_targets_-_score_greater_than_90
Type	Name	Number of hits	Expected score	Adjusted p-value
depleted	hsa-miR-218-5p	497	0	0.00358633
depleted	hsa-miR-511-5p	519	0	0.0414024
TargetScan_-_Predicted_miRNA_families
Type	Name	Number of hits	Expected score	Adjusted p-value
depleted	miR-21/590-5p	279	0	0.0031558
depleted	miR-219-5p/508/508-3p/4782-3p	347	0	0.00412955
depleted	miR-448/448-3p	614	0	0.0157607
SignaLink_-_Pathways
Type	Name	Number of hits	Expected score	Adjusted p-value
depleted	NHR(core)	36	0	0.00687805
enriched	TGF(non-core)	58	0	0.0100589
ConsensusPathDB_-_KEGG
Type	Name	Number of hits	Expected score	Adjusted p-value
enriched	Ribosome	104	0	2.66864e-30
enriched	Proteasome	37	0	4.58101e-20
enriched	Spliceosome	109	0	7.08394e-17
enriched	Oxidative phosphorylation	86	0	6.03982e-14
enriched	Protein processing in endoplasmic reticulum	150	0	5.6752e-13
enriched	Cell cycle	113	0	9.157e-12
enriched	RNA transport	140	0	1.28557e-11
enriched	Parkinson,s disease	98	0	1.04955e-09
enriched	Huntington,s disease	152	0	2.00291e-09
depleted	Maturity onset diabetes of the young	22	0	4.10618e-09
enriched	Ribosome biogenesis in eukaryotes	69	0	4.10618e-09
depleted	Neuroactive ligand-receptor interaction	123	0	1.44555e-08
enriched	DNA replication	33	0	7.28638e-08
enriched	Epstein-Barr virus infection	178	0	7.28638e-08
enriched	Alzheimer,s disease	125	0	1.37665e-07
depleted	Insulin secretion	73	0	6.20251e-07
enriched	Nucleotide excision repair	39	0	8.64937e-07
enriched	Herpes simplex infection	142	0	1.21024e-06
enriched	Pyrimidine metabolism	93	0	1.49786e-06
enriched	Non-alcoholic fatty liver disease (NAFLD)	121	0	4.6173e-06
enriched	Ubiquitin mediated proteolysis	118	0	4.6173e-06
enriched	Viral carcinogenesis	162	0	1.52634e-05
depleted	Drug metabolism - cytochrome P450	51	0	1.97726e-05
depleted	Salivary secretion	61	0	0.000125679
enriched	Shigellosis	59	0	0.000125679
enriched	Phagosome	119	0	0.000139941
enriched	Fanconi anemia pathway	48	0	0.000197548
enriched	Aminoacyl-tRNA biosynthesis	42	0	0.000329275
depleted	Chemical carcinogenesis	60	0	0.000329275
depleted	Vascular smooth muscle contraction	98	0	0.000464813
enriched	Basal transcription factors	34	0	0.00052781
depleted	Calcium signaling pathway	127	0	0.000795931
depleted	Taste transduction	24	0	0.000795931
depleted	Bile secretion	54	0	0.000797612
enriched	Lysosome	111	0	0.000859626
enriched	RIG-I-like receptor signaling pathway	48	0	0.000965999
depleted	Retinol metabolism	44	0	0.000980294
depleted	Metabolism of xenobiotics by cytochrome P450	51	0	0.00100093
enriched	Purine metabolism	150	0	0.00100093
depleted	Gastric acid secretion	57	0	0.00115705
enriched	Amino sugar and nucleotide sugar metabolism	43	0	0.00128812
enriched	RNA polymerase	29	0	0.00129239
enriched	Salmonella infection	71	0	0.00132318
enriched	Endocytosis	227	0	0.00142488
enriched	RNA degradation	68	0	0.00163516
enriched	Homologous recombination	24	0	0.00169288
enriched	NOD-like receptor signaling pathway	51	0	0.00169288
enriched	Influenza A	136	0	0.00236836
enriched	Legionellosis	49	0	0.00246635
enriched	HTLV-I infection	223	0	0.00327455
depleted	Steroid hormone biosynthesis	33	0	0.00327455
enriched	Pathogenic Escherichia coli infection	45	0	0.00403303
enriched	Mismatch repair	21	0	0.0050065
depleted	Ascorbate and aldarate metabolism	21	0	0.00574674
depleted	Pancreatic secretion	79	0	0.00723918
enriched	Cytosolic DNA-sensing pathway	41	0	0.00729128
enriched	Glycolysis / Gluconeogenesis	50	0	0.009353
depleted	Morphine addiction	64	0	0.0108657
depleted	Cholinergic synapse	86	0	0.0109883
enriched	Protein export	22	0	0.0126362
enriched	Glycosaminoglycan biosynthesis - chondroitin sulfate / dermatan sulfate	18	0	0.0136493
enriched	mRNA surveillance pathway	74	0	0.014307
depleted	Retrograde endocannabinoid signaling	69	0	0.0154134
depleted	Nicotine addiction	15	0	0.0160383
depleted	Phosphatidylinositol signaling system	88	0	0.0160383
enriched	Focal adhesion	184	0	0.0192456
enriched	HIF-1 signaling pathway	89	0	0.0192456
enriched	MicroRNAs in cancer	140	0	0.0192456
enriched	Pentose phosphate pathway	23	0	0.0192456
enriched	PI3K-Akt signaling pathway	270	0	0.0196266
enriched	Tuberculosis	135	0	0.0196266
depleted	Arachidonic acid metabolism	48	0	0.0203774
depleted	Circadian entrainment	71	0	0.0215543
depleted	Linoleic acid metabolism	20	0	0.0264983
enriched	Citrate cycle (TCA cycle)	26	0	0.0285516
enriched	N-Glycan biosynthesis	43	0	0.0306152
depleted	Melanogenesis	74	0	0.033689
enriched	Alcoholism	98	0	0.0340269
depleted	Dilated cardiomyopathy	71	0	0.0340269
enriched	Base excision repair	31	0	0.0464081
HG19_GRCh37_-_Cytogenic_Bands
Type	Name	Number of hits	Expected score	Adjusted p-value
depleted	chr19.p12	20	0	6.73825e-07
depleted	chr3.p21.31	114	0	0.000606739
enriched	chr17.q25.1	77	0	0.00122269
enriched	chr20.p13	56	0	0.00122269
depleted	chr7.q34	40	0	0.00122269
enriched	chr17.q25.3	88	0	0.00232116
depleted	chr15.q26.2	5	0	0.00369454
enriched	chr19.p13.3	151	0	0.00369454
enriched	chr2.p23.3	53	0	0.00369454
enriched	chr11.q13.1	82	0	0.0055595
enriched	chr9.q34.11	64	0	0.0109104
depleted	chr19.q13.43	64	0	0.0143843
depleted	chr7.q36.1	56	0	0.0143843
enriched	chr16.p13.3	156	0	0.033072
ConsensusPathDB_-_PharmGKB
Type	Name	Number of hits	Expected score	Adjusted p-value
depleted	Anti-diabetic Drug Potassium Channel Inhibitors Pathway, Pharmacodynamics	27	0	0.000794176
depleted	Antiarrhythmic Pathway, Pharmacodynamics	42	0	0.00100083
depleted	Tamoxifen Pathway, Pharmacokinetics	15	0	0.00100083
depleted	Valproic Acid Pathway, Pharmacokinetics	16	0	0.00165025
depleted	Cyclophosphamide Pathway, Pharmacokinetics	5	0	0.00430844
depleted	Phenytoin Pathway, Pharmacokinetics	17	0	0.00430844
depleted	Proton Pump Inhibitor Pathway, Pharmacodynamics	39	0	0.00430844
depleted	Sorafenib Pharmacokinetics	5	0	0.00430844
depleted	Warfarin Pathway, Pharmacokinetics	5	0	0.00430844
depleted	Clopidogrel Pathway, Pharmacokinetics	6	0	0.00641127
depleted	Gefitinib Pathway, Pharmacokinetics	6	0	0.00641127
depleted	Sympathetic Nerve Pathway (Pre- and Post- Ganglionic Junction)	8	0	0.00947823
depleted	Benzodiazepine Pathway, Pharmacokinetics	8	0	0.0100391
depleted	Artemisinin and Derivatives Pathway, Pharmacokinetics	4	0	0.0130655
depleted	Carbamazepine Pathway, Pharmacokinetics	12	0	0.0256178
depleted	Irinotecan Pathway, Pharmacodynamics	14	0	0.0256178
depleted	Sympathetic Nerve Pathway (Neuroeffector Junction)	12	0	0.0256178
depleted	Fluoxetine Pathway, Pharmacokinetics	5	0	0.0361028
depleted	Erlotinib Pathway, Pharmacokinetics	6	0	0.0372169
depleted	Proton Pump Inhibitor Pathway, Pharmacokinetics	2	0	0.0480464
KEGG_-_Pathways
Type	Name	Number of hits	Expected score	Adjusted p-value
enriched	Ribosome	104	0	2.57246e-30
enriched	Proteasome	37	0	4.41591e-20
enriched	Spliceosome	108	0	1.89049e-17
enriched	Oxidative phosphorylation	86	0	5.82214e-14
enriched	Protein processing in endoplasmic reticulum	150	0	5.47066e-13
enriched	RNA transport	135	0	1.52324e-12
enriched	Cell cycle	113	0	7.56597e-12
enriched	Huntington's disease	143	0	8.44149e-11
enriched	Parkinson's disease	98	0	8.99312e-10
depleted	Maturity onset diabetes of the young	21	0	1.52013e-08
depleted	Neuroactive ligand-receptor interaction	123	0	1.52013e-08
enriched	Ribosome biogenesis in eukaryotes	69	0	2.10072e-08
enriched	Epstein-Barr virus infection	179	0	5.87158e-08
enriched	DNA replication	33	0	7.02377e-08
enriched	Alzheimer's disease	125	0	1.32703e-07
enriched	Pyrimidine metabolism	93	0	4.61478e-07
enriched	Nucleotide excision repair	39	0	8.33764e-07
enriched	Herpes simplex infection	142	0	1.16662e-06
depleted	Insulin secretion	74	0	1.24123e-06
enriched	Non-alcoholic fatty liver disease (NAFLD)	121	0	4.45089e-06
enriched	Ubiquitin mediated proteolysis	118	0	4.45089e-06
enriched	Viral carcinogenesis	162	0	1.47133e-05
depleted	Drug metabolism - cytochrome P450	51	0	1.906e-05
enriched	Shigellosis	56	0	4.11078e-05
depleted	Salivary secretion	61	0	0.000121149
enriched	Phagosome	119	0	0.000134898
enriched	Fanconi anemia pathway	48	0	0.000190428
enriched	Aminoacyl-tRNA biosynthesis	42	0	0.000317407
depleted	Chemical carcinogenesis	60	0	0.000317407
depleted	Vascular smooth muscle contraction	98	0	0.00044806
enriched	Carbon metabolism	90	0	0.000468984
enriched	Basal transcription factors	34	0	0.000492887
depleted	Calcium signaling pathway	128	0	0.000515485
depleted	Taste transduction	24	0	0.000744679
depleted	Bile secretion	54	0	0.000746897
enriched	RIG-I-like receptor signaling pathway	48	0	0.000931183
depleted	Retinol metabolism	44	0	0.000944963
depleted	Metabolism of xenobiotics by cytochrome P450	51	0	0.000990248
enriched	Lysosome	110	0	0.000997932
enriched	Purine metabolism	145	0	0.00103088
depleted	Gastric acid secretion	57	0	0.00108815
enriched	RNA polymerase	29	0	0.00124581
enriched	Salmonella infection	71	0	0.00127549
enriched	Homologous recombination	24	0	0.00170439
enriched	NOD-like receptor signaling pathway	51	0	0.00170439
enriched	Amino sugar and nucleotide sugar metabolism	44	0	0.00226326
enriched	Influenza A	136	0	0.00233157
enriched	Legionellosis	49	0	0.00242699
enriched	Biosynthesis of amino acids	59	0	0.00252572
enriched	HTLV-I infection	223	0	0.00315653
depleted	Steroid hormone biosynthesis	33	0	0.00315653
enriched	Pathogenic Escherichia coli infection	45	0	0.00388768
enriched	Mismatch repair	21	0	0.00482606
depleted	Ascorbate and aldarate metabolism	21	0	0.00553962
depleted	Pancreatic secretion	79	0	0.00685366
enriched	RNA degradation	64	0	0.00685366
enriched	Cytosolic DNA-sensing pathway	41	0	0.00690518
enriched	Pentose phosphate pathway	22	0	0.00860506
depleted	Arachidonic acid metabolism	50	0	0.00876638
depleted	Phosphatidylinositol signaling system	73	0	0.00885515
depleted	Morphine addiction	64	0	0.00995893
depleted	Cholinergic synapse	86	0	0.0100798
enriched	Protein export	22	0	0.0116007
enriched	Endocytosis	181	0	0.0123477
enriched	Glycosaminoglycan biosynthesis - chondroitin sulfate / dermatan sulfate	18	0	0.0123477
enriched	Glycolysis / Gluconeogenesis	49	0	0.0123672
enriched	HIF-1 signaling pathway	91	0	0.0123672
enriched	mRNA surveillance pathway	74	0	0.0125744
depleted	Retrograde endocannabinoid signaling	69	0	0.0135659
depleted	Nicotine addiction	15	0	0.0143559
enriched	PI3K-Akt signaling pathway	269	0	0.0147481
enriched	MicroRNAs in cancer	140	0	0.0176239
enriched	N-Glycan biosynthesis	44	0	0.0176239
enriched	Tuberculosis	135	0	0.0181522
enriched	Focal adhesion	183	0	0.0195037
depleted	Circadian entrainment	71	0	0.0199573
depleted	Linoleic acid metabolism	20	0	0.024548
enriched	Citrate cycle (TCA cycle)	26	0	0.026464
depleted	Melanogenesis	74	0	0.0316526
enriched	Alcoholism	98	0	0.0319906
depleted	Dilated cardiomyopathy	71	0	0.0319906
enriched	Pathways in cancer	278	0	0.0320044
enriched	Base excision repair	31	0	0.0431185
enriched	Ubiquinone and other terpenoid-quinone biosynthesis	8	0	0.0456061
ConsensusPathDB_-_Wikipathways
Type	Name	Number of hits	Expected score	Adjusted p-value
enriched	Cytoplasmic Ribosomal Proteins	72	0	4.37189e-19
enriched	miR-targeted genes in lymphocytes - TarBase	371	0	6.95774e-19
enriched	Proteasome Degradation	58	0	1.47119e-16
enriched	miR-targeted genes in epithelium - TarBase	243	0	2.47134e-16
enriched	miR-targeted genes in muscle cell - TarBase	307	0	6.80654e-14
enriched	Electron Transport Chain	68	0	3.04751e-11
enriched	Retinoblastoma (RB) in Cancer	83	0	5.88047e-11
enriched	miR-targeted genes in leukocytes - TarBase	114	0	5.88047e-11
enriched	mRNA Processing	113	0	4.02039e-10
enriched	Cell Cycle	96	0	7.55723e-10
enriched	Oxidative phosphorylation	45	0	5.38187e-09
enriched	DNA Replication	38	0	6.38e-09
enriched	miR-targeted genes in squamous cell - TarBase	111	0	1.32638e-08
enriched	Parkin-Ubiquitin Proteasomal System pathway	61	0	3.70956e-08
enriched	Eukaryotic Transcription Initiation	38	0	6.95611e-07
enriched	Translation Factors	45	0	6.97446e-07
enriched	Glycolysis and Gluconeogenesis	37	0	7.0114e-06
enriched	Nucleotide Metabolism	19	0	1.98013e-05
enriched	Mismatch repair	9	0	4.07812e-05
enriched	Glucocorticoid Receptor Pathway	65	0	6.37258e-05
enriched	Cori Cycle	14	0	0.000161924
enriched	Cellular response to heat stress	14	0	0.000716628
enriched	miRNA Regulation of DNA Damage Response	65	0	0.000838166
enriched	DNA Damage Response	62	0	0.000843936
depleted	Metapathway biotransformation	125	0	0.000843936
enriched	TNF alpha Signaling Pathway	84	0	0.000843936
enriched	G1 to S cell cycle control	65	0	0.00131438
depleted	Tamoxifen metabolism	16	0	0.00209422
enriched	TGF beta Signaling Pathway	118	0	0.0030845
enriched	Regulation of toll-like receptor signaling pathway	106	0	0.00819098
enriched	Pathogenic Escherichia coli infection	45	0	0.00822125
enriched	Apoptosis-related network due to altered Notch3 in ovarian cancer	50	0	0.0125446
depleted	Constitutive Androstane Receptor Pathway	27	0	0.0134785
enriched	Gastric cancer network 2	29	0	0.014281
enriched	Structural Pathway of Interleukin 1 (IL-1)	39	0	0.014281
enriched	TWEAK Signaling Pathway	40	0	0.014281
depleted	GPCRs, Class A Rhodopsin-like	94	0	0.0147365
enriched	Focal Adhesion	171	0	0.0169793
enriched	p38 MAPK Signaling Pathway	31	0	0.0169793
enriched	Integrated Breast Cancer Pathway	60	0	0.017565
depleted	Nuclear Receptors	32	0	0.0211705
enriched	Oncostatin M Signaling Pathway	64	0	0.0252894
enriched	Senescence and Autophagy in Cancer	88	0	0.0252894
enriched	Mitotic G2-G2-M phases	5	0	0.0266163
enriched	EBV LMP1 signaling	17	0	0.0297505
depleted	Fatty Acid Omega Oxidation	7	0	0.0297505
enriched	IL-1 signaling pathway	47	0	0.0297505
enriched	TCA Cycle	15	0	0.0297505
enriched	Interleukin-11 Signaling Pathway	40	0	0.0299253
enriched	Primary Focal Segmental Glomerulosclerosis FSGS	63	0	0.0299253
enriched	Apoptosis Modulation and Signaling	82	0	0.0476091
enriched	Glycogen Metabolism	32	0	0.048887
miRTarBase_-_Validated_targets
Type	Name	Number of hits	Expected score	Adjusted p-value
enriched	hsa-miR-30a-5p	638	0	4.58205e-29
enriched	hsa-miR-34a-5p	503	0	6.02521e-19
enriched	hsa-miR-320a	493	0	8.52678e-17
enriched	hsa-miR-149-5p	348	0	1.3699e-14
enriched	hsa-miR-30c-5p	452	0	1.0092e-11
enriched	hsa-miR-324-5p	258	0	3.96921e-10
enriched	hsa-miR-744-5p	366	0	4.27194e-10
enriched	hsa-miR-423-3p	198	0	5.63707e-10
enriched	hsa-miR-100-5p	221	0	7.52056e-10
enriched	hsa-miR-331-3p	366	0	6.10406e-09
enriched	hsa-miR-324-3p	279	0	5.03068e-08
enriched	hsa-let-7a-5p	509	0	1.95146e-07
enriched	hsa-miR-877-3p	522	0	2.57851e-07
enriched	hsa-miR-30b-5p	359	0	4.49631e-07
enriched	hsa-miR-30d-5p	323	0	6.14138e-07
enriched	hsa-miR-92b-3p	553	0	1.15595e-06
enriched	hsa-miR-125b-5p	345	0	2.24707e-06
enriched	hsa-miR-222-3p	344	0	2.31749e-06
enriched	hsa-let-7e-5p	488	0	4.04025e-06
enriched	hsa-miR-23b-3p	277	0	6.31159e-06
enriched	hsa-miR-4477a	116	0	7.23195e-06
enriched	hsa-miR-361-5p	134	0	9.89884e-06
enriched	hsa-miR-7-5p	460	0	9.89884e-06
enriched	hsa-miR-18a-3p	296	0	1.29301e-05
enriched	hsa-miR-423-5p	254	0	1.29478e-05
enriched	hsa-miR-30e-5p	307	0	1.35989e-05
enriched	hsa-miR-320b	121	0	1.35989e-05
enriched	hsa-miR-26a-5p	364	0	1.46402e-05
enriched	hsa-miR-196a-5p	254	0	1.63164e-05
enriched	hsa-let-7c-5p	400	0	4.87396e-05
enriched	hsa-miR-375	426	0	7.05077e-05
enriched	hsa-miR-25-3p	389	0	7.92697e-05
enriched	hsa-miR-99a-5p	111	0	8.51213e-05
enriched	hsa-miR-27b-3p	341	0	8.87583e-05
enriched	hsa-miR-216a-3p	184	0	0.000110182
enriched	hsa-miR-3681-3p	184	0	0.000110182
enriched	hsa-miR-1296-5p	101	0	0.000194608
enriched	hsa-miR-1301-3p	164	0	0.000334117
enriched	hsa-miR-652-3p	120	0	0.000334117
enriched	hsa-miR-769-3p	131	0	0.000335492
enriched	hsa-miR-559	152	0	0.000498074
enriched	hsa-miR-10a-5p	379	0	0.000503004
enriched	hsa-miR-93-3p	231	0	0.0005793
enriched	hsa-miR-320c	80	0	0.000901004
enriched	hsa-miR-548a-5p	147	0	0.000901004
enriched	hsa-miR-548ab	147	0	0.000901004
enriched	hsa-miR-548ad-5p	147	0	0.000901004
enriched	hsa-miR-548ae-5p	147	0	0.000901004
enriched	hsa-miR-548ak	147	0	0.000901004
enriched	hsa-miR-548am-5p	147	0	0.000901004
enriched	hsa-miR-548ap-5p	147	0	0.000901004
enriched	hsa-miR-548aq-5p	147	0	0.000901004
enriched	hsa-miR-548ar-5p	147	0	0.000901004
enriched	hsa-miR-548as-5p	147	0	0.000901004
enriched	hsa-miR-548au-5p	147	0	0.000901004
enriched	hsa-miR-548ay-5p	147	0	0.000901004
enriched	hsa-miR-548b-5p	147	0	0.000901004
enriched	hsa-miR-548bb-5p	147	0	0.000901004
enriched	hsa-miR-548c-5p	147	0	0.000901004
enriched	hsa-miR-548d-5p	150	0	0.000901004
enriched	hsa-miR-548h-5p	147	0	0.000901004
enriched	hsa-miR-548i	147	0	0.000901004
enriched	hsa-miR-548j-5p	147	0	0.000901004
enriched	hsa-miR-548o-5p	147	0	0.000901004
enriched	hsa-miR-548w	147	0	0.000901004
enriched	hsa-miR-548y	147	0	0.000901004
enriched	hsa-miR-106a-5p	556	0	0.00157707
enriched	hsa-miR-1226-3p	187	0	0.00180189
enriched	hsa-miR-378a-3p	137	0	0.00204228
enriched	hsa-miR-877-5p	194	0	0.00229224
enriched	hsa-miR-3619-5p	92	0	0.0022982
enriched	hsa-miR-27a-3p	345	0	0.00234055
enriched	hsa-miR-505-3p	174	0	0.00234055
enriched	hsa-miR-125a-5p	205	0	0.00274853
enriched	hsa-miR-761	94	0	0.00275424
enriched	hsa-miR-495-3p	134	0	0.00290805
enriched	hsa-miR-519c-3p	293	0	0.00290805
depleted	hsa-miR-6867-5p	317	0	0.00299201
enriched	hsa-miR-5688	126	0	0.0034463
enriched	hsa-miR-6868-5p	43	0	0.00355034
enriched	hsa-miR-29c-3p	202	0	0.00367857
enriched	hsa-miR-519a-3p	290	0	0.00381582
enriched	hsa-miR-183-5p	287	0	0.00409386
enriched	hsa-miR-199a-3p	84	0	0.00409386
enriched	hsa-miR-301a-3p	322	0	0.00409386
enriched	hsa-miR-29b-3p	194	0	0.00436043
enriched	hsa-miR-3609	261	0	0.00436043
enriched	hsa-miR-548ah-5p	261	0	0.00436043
enriched	hsa-miR-1180-3p	53	0	0.00484841
enriched	hsa-miR-1229-3p	166	0	0.00484841
enriched	hsa-miR-519b-3p	287	0	0.00484841
enriched	hsa-miR-328-3p	107	0	0.0057606
enriched	hsa-miR-15a-5p	599	0	0.00647827
enriched	hsa-miR-4796-3p	234	0	0.00647827
enriched	hsa-let-7f-5p	300	0	0.00695444
enriched	hsa-miR-301b-3p	304	0	0.00695444
enriched	hsa-miR-296-3p	204	0	0.00700924
enriched	hsa-miR-214-3p	142	0	0.00717237
enriched	hsa-miR-4495	105	0	0.00998633
enriched	hsa-miR-6847-5p	89	0	0.0103958
enriched	hsa-miR-1260b	237	0	0.0104981
enriched	hsa-miR-421	197	0	0.0105352
enriched	hsa-miR-454-3p	323	0	0.0122959
enriched	hsa-miR-339-5p	176	0	0.0128327
enriched	hsa-miR-103a-3p	375	0	0.0142312
enriched	hsa-miR-935	100	0	0.0142312
enriched	hsa-miR-32-5p	429	0	0.0149412
enriched	hsa-miR-340-5p	286	0	0.0158671
enriched	hsa-miR-1306-3p	9	0	0.0174974
enriched	hsa-miR-548n	206	0	0.0179777
enriched	hsa-miR-29a-3p	191	0	0.0180474
enriched	hsa-miR-455-3p	369	0	0.0204247
enriched	hsa-miR-146a-5p	147	0	0.0204898
enriched	hsa-miR-137	105	0	0.0207256
enriched	hsa-miR-760	137	0	0.0220182
enriched	hsa-miR-122-5p	431	0	0.0223343
enriched	hsa-miR-5693	227	0	0.0223343
enriched	hsa-miR-151a-5p	50	0	0.0236987
enriched	hsa-miR-570-3p	118	0	0.0250681
enriched	hsa-miR-106b-3p	66	0	0.0258133
enriched	hsa-miR-873-5p	175	0	0.0310508
depleted	hsa-miR-574-5p	272	0	0.0312067
enriched	hsa-miR-3666	296	0	0.0315329
enriched	hsa-miR-4295	296	0	0.0315329
enriched	hsa-miR-19b-3p	630	0	0.0317366
enriched	hsa-miR-526b-3p	503	0	0.0335327
enriched	hsa-miR-130b-3p	480	0	0.0344711
enriched	hsa-miR-320d	65	0	0.035529
enriched	hsa-miR-502-3p	49	0	0.035529
enriched	hsa-miR-199b-3p	60	0	0.0380766
enriched	hsa-miR-363-3p	221	0	0.0394619
enriched	hsa-miR-2115-3p	64	0	0.0405467
enriched	hsa-miR-3689d	184	0	0.0409025
enriched	hsa-miR-18a-5p	225	0	0.0411979
enriched	hsa-miR-657	63	0	0.0411979
enriched	hsa-miR-4743-5p	35	0	0.041543
enriched	hsa-miR-302c-5p	113	0	0.042357
enriched	hsa-miR-3665	90	0	0.042357
enriched	hsa-miR-500a-3p	82	0	0.042357
enriched	hsa-miR-5186	117	0	0.0426583
enriched	hsa-miR-193a-3p	99	0	0.0486172
mirDB_-_Predicted_targets_-_score_greater_than_50
Type	Name	Number of hits	Expected score	Adjusted p-value
depleted	hsa-miR-218-5p	497	0	0.00358633
depleted	hsa-miR-511-5p	519	0	0.0414024
TRANSFAC_-_miRNAs_-_Validated_targets
Type	Name	Number of hits	Expected score	Adjusted p-value
ConsensusPathDB_-_HumanCyc
Type	Name	Number of hits	Expected score	Adjusted p-value
enriched	superpathway of purine nucleotide salvage	48	0	1.04627e-05
enriched	purine nucleotides <i>de novo</i> biosynthesis	49	0	1.43226e-05
enriched	superpathway of conversion of glucose to acetyl CoA and entry into the TCA cycle	39	0	2.75532e-05
enriched	tRNA charging	36	0	0.000137502
enriched	gluconeogenesis	17	0	0.000499862
enriched	glycolysis	19	0	0.00256709
enriched	protein ubiquitylation	37	0	0.0142601
enriched	adenosine ribonucleotides <i>de novo</i> biosynthesis	29	0	0.0209019
enriched	pyrimidine deoxyribonucleotides biosynthesis from CTP	14	0	0.0307126
enriched	guanosine nucleotides <i>de novo</i> biosynthesis	15	0	0.0453436
enriched	TCA cycle	16	0	0.0467058
TRANSFAC_-_Transcription_factors_-_Validated_targets
Type	Name	Number of hits	Expected score	Adjusted p-value
depleted	HNF4A	70	0	4.63818e-06
depleted	HNF1A	46	0	0.000392198
enriched	JUND	43	0	0.00237182
enriched	E2F1	62	0	0.00964121
enriched	TP53	106	0	0.00964121
enriched	FOSL1	21	0	0.0100614
enriched	RELA	137	0	0.0100614
enriched	TFAP2A	62	0	0.0171246
enriched	JUNB	33	0	0.0180137
depleted	HNF1B	13	0	0.0231119
enriched	NONO	10	0	0.0231119
enriched	ATF3	13	0	0.0291046
depleted	CDX2	24	0	0.0299951
enriched	NRF1	41	0	0.0399835
enriched	JUN	122	0	0.0423395
enriched	SFPQ	9	0	0.0423395
GO_-_Biological_Process
Type	Name	Number of hits	Expected score	Adjusted p-value
enriched	biological phase(2)	278	0	2.92204e-36
enriched	cell cycle phase(3)&mitotic cell cycle phase(4)	272	0	2.92204e-36
enriched	translational elongation(6)	183	0	1.49348e-35
enriched	translational termination(7)	144	0	2.13952e-34
enriched	M phase(4)&mitotic M phase(5)	204	0	8.37085e-33
enriched	anaphase(4)&mitotic anaphase(5)	147	0	6.21806e-31
enriched	S phase(4)&mitotic S phase(5)	107	0	1.56081e-27
enriched	ribosome biogenesis(5)	189	0	1.73752e-27
enriched	interphase(4)	109	0	1.80618e-27
enriched	protein localization to endoplasmic reticulum(7)	119	0	1.65596e-23
enriched	SRP dependent cotranslational protein targeting to membrane(6)	92	0	2.75301e-23
enriched	establishment of protein localization to endoplasmic reticulum(6)	100	0	1.28499e-22
enriched	positive regulation of ubiquitin protein ligase activity involved in regulation of mitotic cell cycle transition(7)	65	0	1.31038e-22
enriched	protein targeting to ER(5)	96	0	1.80204e-22
enriched	multi organism metabolic process(3)	185	0	2.9205e-22
enriched	viral gene expression(4)	177	0	4.24434e-22
enriched	cotranslational protein targeting to membrane(7)	94	0	6.1481e-22
enriched	viral transcription(5)	166	0	6.1481e-22
enriched	rRNA processing(6)	125	0	2.4705e-20
enriched	positive regulation of protein ubiquitination involved in ubiquitin dependent protein catabolic process(8)	76	0	2.44292e-19
enriched	rRNA metabolic process(7)	130	0	2.44292e-19
enriched	negative regulation of ubiquitin protein ligase activity involved in mitotic cell cycle(6)	85	0	5.85974e-19
enriched	positive regulation of ubiquitin protein transferase activity(6)	82	0	2.25266e-18
enriched	positive regulation of cellular protein catabolic process(6)	161	0	3.12016e-18
enriched	negative regulation of ubiquitin protein transferase activity(6)	92	0	7.58523e-18
enriched	positive regulation of proteolysis involved in cellular protein catabolic process(7)	149	0	7.91755e-18
enriched	negative regulation of ligase activity(5)	93	0	2.09738e-17
enriched	nuclear transcribed mRNA catabolic process nonsense mediated decay(9)	101	0	5.20676e-17
enriched	nuclear transcribed mRNA catabolic process(8)	166	0	1.23631e-16
enriched	mitotic prometaphase(5)	93	0	1.41403e-16
enriched	regulation of protein ubiquitination involved in ubiquitin dependent protein catabolic process(8)	82	0	1.87254e-16
enriched	positive regulation of ligase activity(5)	87	0	3.40235e-16
enriched	positive regulation of protein ubiquitination(8)	147	0	1.65012e-15
enriched	positive regulation of protein modification by small protein conjugation or removal(7)	159	0	1.7035e-15
enriched	mitochondrial translation(5)	99	0	2.38642e-15
enriched	regulation of ligase activity(5)	120	0	2.84576e-15
enriched	mRNA catabolic process(7)	178	0	4.22291e-15
enriched	mitochondrial translational elongation(6)	67	0	6.62197e-15
enriched	positive regulation of protein catabolic process(5)	224	0	9.97419e-15
enriched	mitotic G1 S transition checkpoint(7)	71	0	1.02423e-14
enriched	signal transduction involved in mitotic G1 DNA damage checkpoint(8)&intracellular signal transduction involved in G1 DNA damage checkpoint(8)	62	0	1.47983e-14
enriched	negative regulation of protein ubiquitination(8)	129	0	2.3631e-14
enriched	mitotic G1 DNA damage checkpoint(7)	70	0	3.20145e-14
enriched	response to endoplasmic reticulum stress(5)	231	0	4.59169e-14
enriched	DNA damage response signal transduction by p53 class mediator resulting in cell cycle arrest(7)	61	0	5.05732e-14
enriched	negative regulation of protein modification by small protein conjugation or removal(7)	136	0	5.39869e-14
enriched	regulation of cellular amino acid metabolic process(5)	57	0	5.96692e-14
enriched	G1 DNA damage checkpoint(7)	71	0	8.51471e-14
enriched	mitochondrial translational termination(6)	69	0	1.22947e-13
enriched	signal transduction involved in mitotic cell cycle checkpoint(6)&signal transduction involved in mitotic DNA damage checkpoint(7)&signal transduction involved in mitotic DNA integrity checkpoint(7)	64	0	1.22947e-13
enriched	ribonucleoprotein complex subunit organization(5)	173	0	3.61274e-13
enriched	mitochondrial translational initiation(5)	67	0	5.37157e-13
enriched	signal transduction involved in DNA integrity checkpoint(6)&signal transduction involved in DNA damage checkpoint(7)	66	0	9.66862e-13
enriched	ribonucleoprotein complex assembly(5)	163	0	2.01009e-12
enriched	signal transduction involved in cell cycle checkpoint(5)	67	0	2.52643e-12
enriched	protein targeting to membrane(6)	180	0	2.75248e-12
enriched	protein polyubiquitination(10)	192	0	3.24244e-12
enriched	regulation of mRNA stability(5)	118	0	4.66983e-12
enriched	response to topologically incorrect protein(4)	165	0	5.07354e-12
enriched	response to unfolded protein(5)	155	0	6.36705e-12
enriched	protein ubiquitination involved in ubiquitin dependent protein catabolic process(9)	159	0	1.37693e-11
enriched	mitotic DNA damage checkpoint(6)	93	0	1.45946e-11
enriched	tRNA metabolic process(7)	178	0	1.97734e-11
enriched	regulation of RNA stability(4)	120	0	2.02482e-11
enriched	mitotic DNA integrity checkpoint(6)	99	0	2.50321e-11
enriched	DNA templated transcription elongation(7)	116	0	7.86621e-11
enriched	de novo posttranslational protein folding(5)	44	0	9.62262e-11
enriched	positive regulation of cell cycle arrest(6)	81	0	9.72741e-11
enriched	NIK NF kappaB signaling(6)	88	0	1.21789e-10
enriched	mitochondrial membrane organization(5)	81	0	1.23931e-10
enriched	nuclear chromosome segregation(5)	175	0	1.78547e-10
enriched	transcription coupled nucleotide excision repair(6)	66	0	1.78547e-10
enriched	DNA templated transcription termination(7)	78	0	2.38247e-10
enriched	regulation of proteasomal ubiquitin dependent protein catabolic process(8)	138	0	2.46045e-10
enriched	de novo protein folding(4)	48	0	2.95051e-10
enriched	polyamine metabolic process(7)	73	0	3.98384e-10
enriched	ribosomal small subunit biogenesis(5)	39	0	4.01302e-10
enriched	regulation of proteasomal protein catabolic process(7)	205	0	6.56605e-10
enriched	regulation of cellular amine metabolic process(5)	72	0	1.00233e-09
enriched	DNA strand elongation involved in DNA replication(7)	33	0	1.45337e-09
enriched	DNA strand elongation(6)	35	0	2.58567e-09
enriched	global genome nucleotide excision repair(6)	55	0	8.33867e-09
enriched	mitotic sister chromatid segregation(6)	116	0	8.33867e-09
enriched	electron transport chain(4)	100	0	1.1791e-08
enriched	sister chromatid segregation(5)	135	0	1.38209e-08
enriched	respiratory electron transport chain(5)	99	0	2.22543e-08
enriched	negative regulation of G1 S transition of mitotic cell cycle(7)	95	0	2.71403e-08
enriched	transcription elongation from RNA polymerase II promoter(8)	81	0	2.71403e-08
enriched	nucleotide excision repair(5)	104	0	2.73575e-08
enriched	regulation of membrane permeability(4)	61	0	3.44821e-08
enriched	cellular response to topologically incorrect protein(5)	133	0	4.03348e-08
enriched	endoplasmic reticulum unfolded protein response(5)	122	0	5.67862e-08
enriched	regulation of mitochondrial membrane permeability(5)	57	0	6.63589e-08
enriched	negative regulation of cell cycle G1 S phase transition(7)	97	0	7.77657e-08
enriched	regulation of cell cycle G1 S phase transition(7)	138	0	9.99774e-08
enriched	apoptotic mitochondrial changes(6)	103	0	1.09166e-07
enriched	regulation of G1 S transition of mitotic cell cycle(7)	131	0	1.12803e-07
enriched	tumor necrosis factor mediated signaling pathway(7)	152	0	1.23683e-07
enriched	stimulatory C type lectin receptor signaling pathway(7)	104	0	1.42979e-07
enriched	cellular response to unfolded protein(6)	125	0	1.48258e-07
enriched	spindle organization(5)	118	0	1.49569e-07
enriched	positive regulation of viral process(4)	98	0	1.98601e-07
enriched	RNA 3 end processing(7)	92	0	2.67274e-07
enriched	ribonucleoside monophosphate biosynthetic process(7)	68	0	2.67274e-07
enriched	innate immune response activating cell surface receptor signaling pathway(6)	106	0	3.32782e-07
enriched	oxidative phosphorylation(5)	65	0	3.36711e-07
enriched	regulation of chromosome segregation(4)	79	0	7.69703e-07
enriched	positive regulation of viral life cycle(5)	94	0	8.23747e-07
enriched	positive regulation of mitochondrion organization(6)	139	0	8.32124e-07
enriched	negative regulation of organelle organization(5)	268	0	1.06596e-06
enriched	maturation of SSU rRNA(6)	28	0	1.18343e-06
enriched	protein localization to mitochondrion(7)	159	0	1.60404e-06
depleted	action potential(5)	92	0	1.61328e-06
enriched	transcription from RNA polymerase I promoter(7)	56	0	1.64582e-06
enriched	regulation of mitochondrial membrane permeability involved in apoptotic process(6)	49	0	1.67437e-06
enriched	ribonucleoside biosynthetic process(7)	95	0	1.95886e-06
enriched	purine nucleoside monophosphate biosynthetic process(7)&purine ribonucleoside monophosphate biosynthetic process(8)	59	0	2.1982e-06
enriched	ribosome assembly(6)	38	0	2.20347e-06
enriched	RNA localization(4)	147	0	2.63743e-06
enriched	establishment of protein localization to mitochondrion(6)	155	0	3.03046e-06
enriched	chromosome separation(5)	68	0	4.74778e-06
enriched	peptidyl asparagine modification(8)	161	0	6.19668e-06
enriched	protein N linked glycosylation via asparagine(6)	161	0	6.19668e-06
enriched	regulation of nuclear division(5)	146	0	6.19668e-06
enriched	tRNA processing(8)	125	0	6.19668e-06
depleted	digestion(4)	100	0	7.0789e-06
enriched	positive regulation of proteasomal protein catabolic process(7)	83	0	7.0789e-06
enriched	negative regulation of chromosome organization(6)	105	0	8.37271e-06
enriched	cytoplasmic translation(7)	37	0	8.54036e-06
enriched	ATP synthesis coupled electron transport(6)	51	0	9.73445e-06
enriched	mitochondrial ATP synthesis coupled electron transport(7)	51	0	9.73445e-06
enriched	mitochondrial outer membrane permeabilization involved in programmed cell death(6)&positive regulation of mitochondrial membrane permeability involved in apoptotic process(7)	46	0	9.95386e-06
enriched	regulation of mitotic nuclear division(6)	130	0	1.04086e-05
depleted	multicellular organismal signaling(4)	84	0	1.10775e-05
enriched	DNA duplex unwinding(8)	54	0	1.16211e-05
enriched	mRNA 3 end processing(8)	70	0	1.16211e-05
enriched	telomere maintenance via telomere lengthening(5)	58	0	1.28698e-05
enriched	ER to Golgi vesicle mediated transport(7)	100	0	1.31129e-05
enriched	maturation of SSU rRNA from tricistronic rRNA transcript SSU rRNA 5 8S rRNA LSU rRNA (7)	23	0	1.34452e-05
enriched	vesicle targeting to from or within Golgi(5)	67	0	1.39687e-05
enriched	IRE1 mediated unfolded protein response(6)	65	0	1.42413e-05
enriched	regulation of translational initiation(5)	68	0	1.42999e-05
enriched	DNA geometric change(7)	58	0	1.50804e-05
depleted	detection of chemical stimulus involved in sensory perception of taste(6)	15	0	1.52769e-05
enriched	DNA replication initiation(6)	29	0	1.62124e-05
enriched	mitochondrial outer membrane permeabilization(6)	45	0	1.6662e-05
enriched	regulation of response to DNA damage stimulus(5)	133	0	1.6662e-05
enriched	cellular response to heat(5)	94	0	1.67049e-05
enriched	regulation of microtubule cytoskeleton organization(5)	114	0	1.80137e-05
enriched	regulation of microtubule based process(4)	138	0	2.09874e-05
enriched	establishment of RNA localization(4)&RNA transport(5)&nucleic acid transport(7)	133	0	2.46589e-05
depleted	detection of chemical stimulus involved in sensory perception(5)	19	0	2.56586e-05
enriched	regulation of mitochondrial outer membrane permeabilization involved in apoptotic signaling pathway(6)	38	0	2.7886e-05
enriched	positive regulation of mitochondrial membrane permeability(6)	47	0	2.85234e-05
enriched	purine nucleoside biosynthetic process(7)&purine ribonucleoside biosynthetic process(8)	83	0	2.91241e-05
enriched	formation of translation preinitiation complex(5)	17	0	2.91339e-05
enriched	ribosomal large subunit biogenesis(5)	32	0	2.91745e-05
enriched	spindle checkpoint(6)	50	0	2.91947e-05
enriched	protein N linked glycosylation(5)	169	0	2.92454e-05
enriched	interstrand cross link repair(5)	37	0	3.08657e-05
enriched	tRNA aminoacylation for protein translation(7)	47	0	3.13151e-05
enriched	RNA phosphodiester bond hydrolysis(6)	100	0	3.15063e-05
enriched	organelle disassembly(5)	190	0	3.18238e-05
depleted	sensory perception of bitter taste(9)	17	0	3.69547e-05
enriched	telomere organization(6)	90	0	3.70615e-05
enriched	mitotic recombination(7)	41	0	3.70639e-05
depleted	synaptic transmission cholinergic(6)	22	0	3.73539e-05
depleted	adenylate cyclase modulating G protein coupled receptor signaling pathway(7)	84	0	3.84694e-05
enriched	amino acid activation(5)&tRNA aminoacylation(6)	50	0	3.86801e-05
enriched	negative regulation of cell division(4)	73	0	4.04469e-05
enriched	telomere maintenance via recombination(5)	26	0	4.10966e-05
enriched	regulation of mitotic sister chromatid separation(7)	55	0	4.2358e-05
enriched	positive regulation of viral transcription(6)	54	0	4.23711e-05
enriched	negative regulation of nuclear division(5)	63	0	4.43821e-05
enriched	termination of RNA polymerase II transcription(8)	35	0	4.44879e-05
enriched	cytokinesis(5)	148	0	4.56244e-05
enriched	positive regulation of proteasomal ubiquitin dependent protein catabolic process(8)	71	0	4.79721e-05
enriched	spliceosomal snRNP assembly(6)	33	0	4.79721e-05
enriched	localization within membrane(4)	81	0	4.96377e-05
enriched	keratinocyte differentiation(6)	76	0	5.23993e-05
enriched	single organism membrane budding(5)	74	0	5.23993e-05
enriched	DNA damage response detection of DNA damage(4)	32	0	5.58645e-05
enriched	base excision repair(5)	48	0	5.58645e-05
enriched	regulation of sister chromatid segregation(5)	65	0	6.01097e-05
depleted	detection of chemical stimulus involved in sensory perception of bitter taste(7)	14	0	6.05413e-05
enriched	nuclear export(8)	133	0	6.14388e-05
enriched	positive regulation of peptidase activity(6)	145	0	6.14388e-05
enriched	proteasomal ubiquitin independent protein catabolic process(7)	19	0	6.14388e-05
enriched	ribonucleoprotein complex localization(4)	78	0	6.14388e-05
enriched	mitochondrial electron transport NADH to ubiquinone(6)	38	0	6.56769e-05
enriched	vesicle targeting(4)	80	0	7.50815e-05
enriched	negative regulation of Wnt signaling pathway(5)	158	0	7.66584e-05
enriched	metaphase anaphase transition of cell cycle(6)	54	0	8.16298e-05
enriched	metaphase anaphase transition of mitotic cell cycle(5)	54	0	8.16298e-05
enriched	mitotic sister chromatid separation(6)	56	0	8.28479e-05
enriched	regulation of mitotic sister chromatid segregation(6)	58	0	8.32438e-05
enriched	negative regulation of canonical Wnt signaling pathway(6)	132	0	9.22835e-05
enriched	positive regulation of canonical Wnt signaling pathway(6)	113	0	0.000115245
enriched	telomere maintenance(4)	88	0	0.000118855
enriched	response to UV(6)	117	0	0.00012073
depleted	G protein coupled receptor signaling pathway coupled to cyclic nucleotide second messenger(6)	94	0	0.000148345
enriched	toll like receptor 3 signaling pathway(8)	85	0	0.000154514
enriched	negative regulation of chromosome segregation(4)&negative regulation of sister chromatid segregation(5)	46	0	0.000159846
enriched	negative regulation of proteasomal ubiquitin dependent protein catabolic process(8)	59	0	0.000167341
enriched	ribonucleoprotein complex export from nucleus(5)	75	0	0.00016778
depleted	transmission of nerve impulse(5)	41	0	0.000174534
enriched	MyD88 independent toll like receptor signaling pathway(8)	75	0	0.000175863
enriched	regulation of mRNA processing(6)	85	0	0.000175863
enriched	mRNA transport(6)	112	0	0.00018746
depleted	regulation of heart contraction(6)	125	0	0.000190829
depleted	sodium ion transmembrane transport(8)	97	0	0.00020361
enriched	nucleotide excision repair DNA gap filling(6)	22	0	0.000215437
enriched	chaperone mediated protein folding(4)	41	0	0.000228497
enriched	nuclear transcribed mRNA catabolic process exonucleolytic(9)	30	0	0.00023116
enriched	cell redox homeostasis(4)	49	0	0.000255737
enriched	hemidesmosome assembly(7)	12	0	0.000255737
enriched	telomere maintenance via semi conservative replication(5)	24	0	0.00027542
enriched	peptidyl proline modification(8)	50	0	0.000277761
enriched	negative regulation of mitotic sister chromatid segregation(6)&negative regulation of mitotic sister chromatid separation(7)	44	0	0.000290601
enriched	nuclear envelope organization(5)	65	0	0.000296943
depleted	cellular potassium ion transport(4)&potassium ion transmembrane transport(5)	116	0	0.000312625
depleted	cyclic nucleotide biosynthetic process(7)	90	0	0.000314146
depleted	cyclic purine nucleotide metabolic process(8)	90	0	0.000314146
enriched	postreplication repair(5)	53	0	0.000321598
enriched	regulation of metaphase anaphase transition of cell cycle(7)	52	0	0.000321598
enriched	regulation of mitotic metaphase anaphase transition(6)	52	0	0.000321598
enriched	nuclear DNA replication(5)	35	0	0.00034192
enriched	TRIF dependent toll like receptor signaling pathway(9)	73	0	0.000350599
enriched	regulation of mRNA metabolic process(6)	94	0	0.000356504
enriched	RNA capping(7)&7 methylguanosine RNA capping(8)	35	0	0.000362839
enriched	positive regulation of endopeptidase activity(7)	134	0	0.000362839
enriched	exonucleolytic nuclear transcribed mRNA catabolic process involved in deadenylation dependent decay(10)	27	0	0.000373965
enriched	mitophagy(4)&mitochondrion disassembly(6)	173	0	0.000373965
enriched	negative regulation of intrinsic apoptotic signaling pathway(6)	86	0	0.000373965
enriched	ER associated ubiquitin dependent protein catabolic process(5)	64	0	0.000394164
enriched	negative regulation of mRNA processing(6)	32	0	0.000397002
depleted	neuronal action potential(6)	22	0	0.000397851
enriched	7 methylguanosine mRNA capping(8)	31	0	0.000406328
enriched	regulation of chromosome organization(6)	233	0	0.000417153
enriched	membrane budding(5)	105	0	0.000417999
depleted	epoxygenase P450 pathway(7)	12	0	0.000424773
enriched	cell cycle DNA replication(5)	42	0	0.000438492
enriched	negative regulation of proteasomal protein catabolic process(7)	63	0	0.00052932
enriched	negative regulation of metaphase anaphase transition of cell cycle(7)	43	0	0.000575444
enriched	negative regulation of mitotic metaphase anaphase transition(6)&mitotic spindle checkpoint(6)	43	0	0.000575444
depleted	sensory perception of taste(8)	28	0	0.000579617
enriched	decidualization(4)	19	0	0.000599038
depleted	positive regulation of cation transmembrane transport(6)	54	0	0.00059951
enriched	negative regulation of mitotic nuclear division(6)	55	0	0.000600211
enriched	maturation of 5 8S rRNA(7)	20	0	0.000652368
enriched	ATP dependent chromatin remodeling(8)	53	0	0.000660711
enriched	RNA export from nucleus(6)	76	0	0.000690521
enriched	NADH metabolic process(9)	32	0	0.000740505
enriched	intrinsic apoptotic signaling pathway in response to DNA damage(6)	96	0	0.000740505
enriched	positive regulation of mitochondrial outer membrane permeabilization involved in apoptotic signaling pathway(5)	32	0	0.00074581
depleted	flavonoid biosynthetic process(5)&flavonoid glucuronidation(5)	14	0	0.000776377
enriched	nucleotide binding domain leucine rich repeat containing receptor signaling pathway(6)	47	0	0.00079972
enriched	regulation of viral transcription(6)	71	0	0.00079972
enriched	spindle assembly(6)	70	0	0.000841123
enriched	error free translesion synthesis(6)	18	0	0.000852703
enriched	proteasome assembly(7)	12	0	0.000864573
enriched	regulation of DNA repair(5)	66	0	0.000876094
enriched	ERAD pathway(4)	78	0	0.000892724
depleted	membrane depolarization during action potential(6)	32	0	0.000900992
enriched	gene silencing by RNA(5)	99	0	0.00091142
enriched	termination of RNA polymerase I transcription(8)	30	0	0.000984243
enriched	protein sumoylation(9)	97	0	0.000994532
enriched	cell death in response to oxidative stress(5)	55	0	0.000997854
depleted	endocrine pancreas development(4)	52	0	0.000997854
enriched	modulation by symbiont of host cellular process(4)	48	0	0.00101247
enriched	regulation of cellular response to heat(5)	66	0	0.00114939
enriched	rRNA transcription(8)	27	0	0.00116129
enriched	positive regulation of mitotic cell cycle(5)	100	0	0.00116251
enriched	vesicle coating(6)	76	0	0.00122153
enriched	negative regulation of cellular protein catabolic process(6)	71	0	0.00126207
enriched	nucleus organization(5)	107	0	0.00129856
enriched	prophase(4)&mitotic prophase(5)	60	0	0.00129856
enriched	nucleobase containing compound transport(6)	160	0	0.00130717
enriched	positive regulation of Wnt signaling pathway(5)	143	0	0.00132438
enriched	protein targeting to mitochondrion(5)	128	0	0.00143595
depleted	regulation of insulin secretion(6)	156	0	0.00145803
enriched	ribonucleoside triphosphate biosynthetic process(7)	48	0	0.00154767
enriched	negative regulation of mRNA metabolic process(6)	36	0	0.00158658
enriched	spindle assembly checkpoint(7)	42	0	0.00167306
enriched	mRNA export from nucleus(6)&mRNA containing ribonucleoprotein complex export from nucleus(6)	65	0	0.00172803
enriched	microtubule polymerization or depolymerization(6)	74	0	0.0017676
enriched	negative regulation of oxidative stress induced cell death(5)	28	0	0.00177761
enriched	regulation of double strand break repair(6)	33	0	0.00187134
depleted	regulation of ion transmembrane transporter activity(6)	139	0	0.00194276
enriched	COPII coated vesicle budding(5)	58	0	0.00202689
enriched	COPI coated vesicle budding(6)&Golgi transport vesicle coating(6)&COPI coating of Golgi vesicle(7)	13	0	0.0020336
depleted	positive regulation of ion transmembrane transporter activity(5)	50	0	0.00209831
enriched	mitotic spindle assembly checkpoint(6)&negative regulation of ubiquitin protein ligase activity(7)	41	0	0.00228672
enriched	negative regulation of gene expression epigenetic(6)	102	0	0.00232643
enriched	negative regulation of mRNA polyadenylation(8)	8	0	0.0023603
enriched	positive regulation of establishment of protein localization to mitochondrion(4)	97	0	0.00238171
enriched	mitotic spindle organization(6)	70	0	0.00240893
enriched	nucleotide excision repair DNA incision(6)	36	0	0.00243636
enriched	protein DNA complex assembly(6)	116	0	0.00243636
enriched	regulation of oxidative stress induced cell death(5)	40	0	0.00248013
enriched	cytoplasmic pattern recognition receptor signaling pathway(6)	49	0	0.00250777
enriched	ncRNA transcription(7)	35	0	0.00253728
depleted	positive regulation of ion transmembrane transport(5)	76	0	0.00264107
enriched	regulation of establishment of protein localization to mitochondrion(6)	106	0	0.00283795
enriched	vesicle targeting rough ER to cis Golgi(6)&COPII vesicle coating(6)	53	0	0.00283795
depleted	pancreas development(4)	75	0	0.00285053
enriched	mitotic metaphase plate congression(5)	31	0	0.00285055
depleted	cyclic nucleotide metabolic process(7)	122	0	0.00293907
enriched	protein peptidyl prolyl isomerization(9)	37	0	0.00300124
enriched	regulation of histone ubiquitination(6)	8	0	0.00308488
enriched	protein insertion into membrane(5)	35	0	0.00343989
enriched	nucleotide excision repair DNA damage recognition(6)	21	0	0.00347273
enriched	protein DNA complex subunit organization(5)	138	0	0.00348534
enriched	error prone translesion synthesis(6)	19	0	0.00351096
depleted	positive regulation of transporter activity(4)	57	0	0.00351096
enriched	regulation of transcription involved in G1 S transition of mitotic cell cycle(6)	22	0	0.00351096
enriched	transcription elongation from RNA polymerase I promoter(8)	28	0	0.00351096
enriched	regulation of double strand break repair via homologous recombination(7)	16	0	0.00363884
enriched	maternal placenta development(4)	27	0	0.00366669
enriched	cellular response to hypoxia(5)	104	0	0.00371338
depleted	regulation of transmembrane transporter activity(5)	142	0	0.0037349
enriched	transcription initiation from RNA polymerase I promoter(8)	33	0	0.0037349
enriched	modulation by virus of host process(5)	45	0	0.00375618
depleted	sodium ion transport(8)	141	0	0.00397414
enriched	negative regulation of proteolysis involved in cellular protein catabolic process(7)	67	0	0.00412866
enriched	type I interferon production(5)	110	0	0.00420981
enriched	negative regulation of cellular response to oxidative stress(4)&negative regulation of response to oxidative stress(4)	29	0	0.00427543
enriched	regulation of ubiquitin protein ligase activity(7)	42	0	0.0043917
enriched	cellular response to decreased oxygen levels(6)	107	0	0.0044083
enriched	double strand break repair via synthesis dependent strand annealing(7)	27	0	0.0044083
enriched	purine nucleoside triphosphate biosynthetic process(7)	44	0	0.00443228
enriched	nucleoside triphosphate biosynthetic process(6)	60	0	0.00445192
depleted	insulin secretion(6)	178	0	0.00460093
enriched	positive regulation of histone ubiquitination(6)	5	0	0.00478731
enriched	toll like receptor 9 signaling pathway(8)	68	0	0.00495762
enriched	cellular response to oxygen levels(5)	116	0	0.00496043
enriched	protein deneddylation(7)	8	0	0.00504579
enriched	transcription of nuclear large rRNA transcript from RNA polymerase I promoter(8)	11	0	0.0050919
depleted	digestive system process(5)	59	0	0.005649
enriched	purine nucleobase metabolic process(6)	35	0	0.00584775
depleted	regulation of synaptic transmission cholinergic(5)	10	0	0.00601983
enriched	vesicle organization(5)	247	0	0.00602785
enriched	positive regulation of cysteine type endopeptidase activity(8)	122	0	0.00603329
enriched	keratinization(4)	19	0	0.0061907
enriched	metaphase plate congression(6)	41	0	0.0065273
enriched	positive regulation of protein insertion into mitochondrial membrane involved in apoptotic signaling pathway(5)&regulation of protein insertion into mitochondrial membrane involved in apoptotic signaling pathway(6)	25	0	0.00656282
enriched	regulation of centrosome cycle(6)	34	0	0.00669587
enriched	regulation of DNA recombination(6)	51	0	0.00672894
enriched	Golgi vesicle transport(6)	262	0	0.00675058
enriched	regulation of type I interferon production(5)	108	0	0.00699175
enriched	cellular response to UV(7)	61	0	0.00710378
enriched	NADH regeneration(5)&canonical glycolysis(6)&glycolytic process through glucose 6 phosphate(8)&glucose catabolic process to pyruvate(9)	22	0	0.00753415
enriched	glycolytic process through fructose 6 phosphate(7)	22	0	0.00753415
enriched	nucleotide binding oligomerization domain containing signaling pathway(7)	32	0	0.00753415
enriched	positive regulation of cellular amide metabolic process(5)	79	0	0.00764123
enriched	response to gamma radiation(6)	48	0	0.00778679
enriched	purine ribonucleoside triphosphate biosynthetic process(8)	43	0	0.00794183
enriched	ribosomal small subunit assembly(6)	12	0	0.0080449
enriched	T cell receptor signaling pathway(7)	150	0	0.00810738
enriched	negative regulation of mRNA 3 end processing(7)	10	0	0.00813041
enriched	negative regulation of cysteine type endopeptidase activity(8)	86	0	0.00815612
enriched	mitochondrial ATP synthesis coupled proton transport(6)	14	0	0.00817339
enriched	regulation of canonical Wnt signaling pathway(6)	197	0	0.00817339
enriched	necrotic cell death(5)	42	0	0.00829766
depleted	positive regulation of action potential(3)	8	0	0.00840818
enriched	centrosome cycle(5)	61	0	0.00846743
enriched	toll like receptor 5 signaling pathway(8)	63	0	0.00846743
enriched	cleavage involved in rRNA processing(7)	16	0	0.00894061
depleted	drug metabolic process(4)	36	0	0.00894061
enriched	maturation of 5 8S rRNA from tricistronic rRNA transcript SSU rRNA 5 8S rRNA LSU rRNA (8)	16	0	0.00894061
enriched	multi organism localization(3)&multi organism transport(4)	36	0	0.00947614
enriched	aerobic respiration(6)	53	0	0.00974343
depleted	regulation of peptide hormone secretion(5)	173	0	0.00982919
enriched	lagging strand elongation(6)	6	0	0.0100877
enriched	membrane disassembly(5)&nuclear envelope disassembly(6)	42	0	0.0101424
enriched	regulation of transcription from RNA polymerase II promoter in response to hypoxia(6)	29	0	0.0103903
enriched	mitotic nuclear envelope disassembly(6)	40	0	0.0108981
enriched	protein insertion into mitochondrial membrane involved in apoptotic signaling pathway(5)	27	0	0.0110607
enriched	protein insertion into mitochondrial membrane(4)	27	0	0.0110607
enriched	cellular response to type I interferon(6)	67	0	0.0112603
enriched	response to type I interferon(5)	67	0	0.0112603
enriched	type I interferon signaling pathway(7)	67	0	0.0112603
depleted	regulation of cyclic nucleotide biosynthetic process(7)	76	0	0.0114639
enriched	toll like receptor 10 signaling pathway(8)	62	0	0.0115266
enriched	regulation of Wnt signaling pathway(5)	256	0	0.0116776
depleted	calcium ion transmembrane transport(8)	140	0	0.0119255
depleted	cell fate determination(5)	31	0	0.0119255
enriched	dichotomous subdivision of an epithelial terminal unit(6)	10	0	0.0119255
enriched	positive regulation of protein complex assembly(4)	171	0	0.0120956
enriched	regulation of necrotic cell death(5)	25	0	0.0125059
enriched	ribosomal subunit export from nucleus(5)&ribosome localization(5)&establishment of ribosome localization(5)	8	0	0.0126104
enriched	negative regulation of cysteine type endopeptidase activity involved in apoptotic process(7)	83	0	0.012673
enriched	toll like receptor TLR1 TLR2 signaling pathway(8)&toll like receptor TLR6 TLR2 signaling pathway(8)	68	0	0.0127775
depleted	regulation of cyclase activity(5)	50	0	0.0128884
depleted	glutamate receptor signaling pathway(6)	45	0	0.012905
enriched	translesion synthesis(5)	46	0	0.013432
enriched	positive regulation of translation(6)	66	0	0.013771
depleted	lipid homeostasis(6)	100	0	0.0140214
enriched	positive regulation of cell cycle phase transition(6)	53	0	0.0141638
enriched	RNA secondary structure unwinding(6)	39	0	0.0142248
enriched	modification by symbiont of host morphology or physiology(5)	61	0	0.0142248
depleted	regulation of heart rate(4)	60	0	0.0142248
enriched	transcription from RNA polymerase III promoter(7)	51	0	0.0144183
enriched	regulation of exit from mitosis(7)	15	0	0.0146254
enriched	release of cytochrome c from mitochondria(6)	49	0	0.0149409
enriched	positive regulation of cysteine type endopeptidase activity involved in apoptotic process(7)	113	0	0.0149596
enriched	cullin deneddylation(8)	7	0	0.0149702
enriched	programmed necrotic cell death(6)	38	0	0.0151951
depleted	flavonoid metabolic process(4)	19	0	0.0153241
enriched	protein localization to chromosome(7)	41	0	0.0155669
depleted	cell cell adhesion via plasma membrane adhesion molecules(5)	182	0	0.0155972
enriched	negative regulation of DNA replication(6)	42	0	0.0156885
depleted	positive regulation of potassium ion transmembrane transport(6)	19	0	0.0158204
enriched	regulation of transcription from RNA polymerase I promoter(7)	23	0	0.0158204
enriched	chromosome localization(5)&establishment of chromosome localization(5)	54	0	0.0158501
depleted	regulation of adenylate cyclase activity(6)	42	0	0.0159075
enriched	neutrophil apoptotic process(5)	3	0	0.015991
enriched	transport of virus(5)	35	0	0.0160261
enriched	skin development(5)	174	0	0.0160437
depleted	regulation of nucleotide biosynthetic process(6)&regulation of purine nucleotide biosynthetic process(7)	82	0	0.0160817
enriched	polysaccharide biosynthetic process(6)	68	0	0.0163994
depleted	smooth muscle cell differentiation(6)	41	0	0.0166848
enriched	antigen processing and presentation of peptide or polysaccharide antigen via MHC class II(4)	88	0	0.0167087
depleted	cAMP biosynthetic process(9)	72	0	0.0169032
depleted	regulation of peptide secretion(6)	177	0	0.017089
depleted	neuropeptide signaling pathway(6)	39	0	0.0171883
enriched	modulation by virus of host morphology or physiology(5)	55	0	0.0179002
depleted	peptide hormone secretion(7)	206	0	0.0180805
enriched	cell death in response to hydrogen peroxide(6)	16	0	0.018853
enriched	establishment of protein localization to mitochondrial membrane(4)	6	0	0.0192598
depleted	circadian sleep wake cycle REM sleep(5)	4	0	0.0198811
enriched	regulation of mRNA polyadenylation(8)	9	0	0.0202392
depleted	nitric oxide mediated signal transduction(7)	18	0	0.020372
depleted	regulation of cation transmembrane transport(6)	130	0	0.0204536
enriched	regulation of translational initiation in response to stress(6)	17	0	0.0208275
enriched	negative regulation of protein catabolic process(5)	114	0	0.0211703
enriched	DNA replication Okazaki fragment processing(6)&DNA replication removal of RNA primer(6)	5	0	0.0212186
enriched	IMP metabolic process(8)	12	0	0.0218841
enriched	cytoskeleton dependent cytokinesis(6)	35	0	0.0219749
depleted	regulation of hormone secretion(4)	208	0	0.0220841
enriched	RNA phosphodiester bond hydrolysis endonucleolytic(7)	51	0	0.0221516
enriched	DNA packaging(7)	117	0	0.0221928
enriched	MyD88 dependent toll like receptor signaling pathway(8)	78	0	0.022326
enriched	multi organism intracellular transport(5)&intracellular transport of virus(6)	32	0	0.0228472
enriched	positive regulation of intrinsic apoptotic signaling pathway(6)	54	0	0.0228867
depleted	excretion(5)	47	0	0.0233395
depleted	negative regulation of very low density lipoprotein particle remodeling(4)	2	0	0.0233395
enriched	toll like receptor 2 signaling pathway(8)	72	0	0.0233495
depleted	cardiac conduction(5)	48	0	0.0236608
enriched	TOR signaling(6)	71	0	0.023981
depleted	hormone secretion(6)	244	0	0.0245224
enriched	cellular response to light stimulus(6)	86	0	0.0254781
depleted	homophilic cell adhesion via plasma membrane adhesion molecules(6)	131	0	0.0255327
enriched	negative regulation of centrosome duplication(6)&negative regulation of centrosome cycle(6)	8	0	0.0257161
enriched	nuclear transcribed mRNA catabolic process deadenylation dependent decay(9)	60	0	0.0259079
enriched	positive regulation of RNA polymerase II transcriptional preinitiation complex assembly(7)	9	0	0.0260542
depleted	drug catabolic process(5)	18	0	0.0269506
enriched	regulation of protein phosphatase type 2A activity(8)	23	0	0.0269506
enriched	regulation of mRNA splicing via spliceosome(7)	49	0	0.0270248
enriched	negative regulation of DNA metabolic process(5)	85	0	0.0270399
enriched	regulation of ERBB signaling pathway(5)	70	0	0.0275516
enriched	positive regulation of mitotic cell cycle phase transition(6)	49	0	0.0285226
enriched	negative regulation of cellular catabolic process(5)	147	0	0.0287662
enriched	negative regulation of epidermal growth factor receptor signaling pathway(6)	40	0	0.0290043
enriched	regulation of epidermal growth factor receptor signaling pathway(6)	68	0	0.0291522
depleted	peptide secretion(6)	212	0	0.0292228
enriched	activation of cysteine type endopeptidase activity(8)	92	0	0.0301645
depleted	negative regulation of lipid metabolic process(4)	72	0	0.0303816
enriched	placenta development(4)	122	0	0.031285
depleted	positive T cell selection(4)	23	0	0.0318617
enriched	regulation of intrinsic apoptotic signaling pathway in response to DNA damage(6)	33	0	0.0334325
enriched	pyrimidine nucleoside biosynthetic process(7)	27	0	0.0363862
enriched	glucose catabolic process(8)	25	0	0.0365243
enriched	nucleosome assembly(6)	74	0	0.0373554
enriched	nucleotide salvage(6)	10	0	0.0373554
enriched	purine nucleobase biosynthetic process(6)	10	0	0.0373554
enriched	negative regulation of response to DNA damage stimulus(4)	46	0	0.0374005
enriched	regulation of cytokinesis(5)	70	0	0.0386195
enriched	endoderm development(5)	60	0	0.0392196
enriched	protein modification by small protein removal(6)	98	0	0.0392196
depleted	exogenous drug catabolic process(5)	16	0	0.0398408
depleted	chemokine C X C motif ligand 2 production(6)	8	0	0.0401972
enriched	cytochrome complex assembly(7)	19	0	0.0401972
enriched	regulation of transcription from RNA polymerase II promoter in response to stress(6)	54	0	0.0409624
depleted	cytosolic calcium ion transport(10)	84	0	0.0421372
depleted	sodium ion homeostasis(9)	31	0	0.0422546
enriched	RNA modification(6)	99	0	0.042663
enriched	mRNA polyadenylation(7)	33	0	0.042663
depleted	membrane repolarization(5)	28	0	0.0432355
depleted	retina morphogenesis in camera type eye(5)	40	0	0.0432522
enriched	negative regulation of histone modification(5)	33	0	0.0433562
enriched	regulation of early endosome to late endosome transport(5)	14	0	0.0435099
enriched	intrinsic apoptotic signaling pathway by p53 class mediator(7)	65	0	0.0435693
enriched	nucleosome organization(6)	95	0	0.0436611
enriched	regulation of extrinsic apoptotic signaling pathway(6)	137	0	0.0439371
enriched	cellular response to arsenic containing substance(5)	13	0	0.0444856
depleted	regulation of cAMP biosynthetic process(8)	65	0	0.0447029
depleted	positive regulation of potassium ion transport(5)	28	0	0.0447359
enriched	AMP biosynthetic process(9)	7	0	0.0450754
enriched	DNA strand renaturation(6)	9	0	0.0450889
enriched	AMP metabolic process(8)	15	0	0.0451797
enriched	regulation of viral genome replication(6)	61	0	0.0456366
enriched	centrosome separation(5)	9	0	0.0459346
depleted	positive regulation of sodium ion transport(5)	30	0	0.0459346
depleted	regulation of neurotransmitter levels(4)	153	0	0.0459346
enriched	positive regulation of type I interferon production(5)	77	0	0.0461287
enriched	rRNA containing ribonucleoprotein complex export from nucleus(6)	10	0	0.0463727
enriched	RNA polyadenylation(6)	34	0	0.0466437
depleted	T cell selection(3)	38	0	0.0471922
depleted	regulation of potassium ion transport(7)	61	0	0.047823
depleted	synapse organization(4)	170	0	0.0481753
enriched	viral genome replication(5)	79	0	0.0484412
depleted	regulation of transcription involved in cell fate commitment(6)	15	0	0.0485443
enriched	protein folding in endoplasmic reticulum(4)	10	0	0.0495101
BioCarta_-_Pathways
Type	Name	Number of hits	Expected score	Adjusted p-value
enriched	Glycolysis Pathway	3	0	0.00784378
enriched	Sonic Hedgehog (SHH) Receptor Ptc1 Regulates cell cycle	10	0	0.0317454
enriched	Cell Cycle: G2/M Checkpoint	24	0	0.0383527
enriched	p38 MAPK Signaling Pathway	31	0	0.0383527
miRWalk_-_Predicted_targets_-_5-UTR
Type	Name	Number of hits	Expected score	Adjusted p-value
depleted	hsa-miR-1277-5p	395	0	8.80168e-05
depleted	hsa-miR-4766-3p	524	0	8.80168e-05
enriched	hsa-miR-6510-3p	539	0	9.30183e-05
depleted	hsa-miR-4666a-5p	508	0	0.000487799
depleted	hsa-miR-3689e	428	0	0.00304428
depleted	hsa-miR-5700	463	0	0.00334602
depleted	hsa-miR-95-5p	558	0	0.00334602
depleted	hsa-miR-4637	323	0	0.00511342
depleted	hsa-miR-5011-5p	469	0	0.00511342
depleted	hsa-miR-5692b	477	0	0.00511342
depleted	hsa-miR-5692c	477	0	0.00511342
depleted	hsa-miR-6516-3p	485	0	0.00511342
depleted	hsa-miR-8061	541	0	0.00511342
depleted	hsa-miR-190a-3p	406	0	0.00613621
depleted	hsa-miR-380-3p	515	0	0.00613621
depleted	hsa-miR-4662a-3p	491	0	0.00735824
depleted	hsa-miR-4477a	560	0	0.00745821
depleted	hsa-let-7f-1-3p	543	0	0.0174978
depleted	hsa-miR-410-3p	534	0	0.0180946
depleted	hsa-miR-487a-3p	551	0	0.0194928
depleted	hsa-miR-3529-3p	568	0	0.0259497
depleted	hsa-miR-369-3p	424	0	0.0259497
depleted	hsa-miR-4760-5p	497	0	0.0259497
depleted	hsa-miR-6502-3p	540	0	0.0259497
depleted	hsa-miR-7852-3p	458	0	0.0259497
depleted	hsa-miR-374a-5p	544	0	0.034574
depleted	hsa-miR-5007-3p	424	0	0.0371217
depleted	hsa-miR-3927-5p	377	0	0.041661
depleted	hsa-miR-4671-3p	501	0	0.041661
depleted	hsa-miR-5583-5p	365	0	0.0455823
DrugBank_-_Validated_targets
Type	Name	Number of hits	Expected score	Adjusted p-value
enriched	L-Proline	19	0	0.0491446
depleted	Spironolactone	17	0	0.0491446
depleted	Valproic Acid	16	0	0.0491446
depleted	Verapamil	13	0	0.0491446
depleted	Zonisamide	21	0	0.0491446
Phosphosite_-_Diseases
Type	Name	Number of hits	Expected score	Adjusted p-value
ConsensusPathDB_-_EHMN
Type	Name	Number of hits	Expected score	Adjusted p-value
enriched	Glycolysis and Gluconeogenesis	58	0	1.96171e-05
enriched	Purine metabolism	187	0	1.96171e-05
enriched	Pyrimidine metabolism	121	0	1.96171e-05
depleted	Xenobiotics metabolism	36	0	0.000129769
enriched	Vitamin D3 (cholecalciferol) metabolism	26	0	0.000536647
enriched	Aminosugars metabolism	46	0	0.00062159
enriched	De novo fatty acid biosynthesis	40	0	0.000883952
enriched	Proteoglycan biosynthesis	28	0	0.00103937
enriched	Urea cycle and metabolism of arginine, proline, glutamate, aspartate and asparagine	93	0	0.00281858
depleted	Vitamin A (retinol) metabolism	19	0	0.00347298
enriched	Prostaglandin formation from dihomo gama-linoleic acid	29	0	0.00446949
enriched	N-Glycan biosynthesis	38	0	0.00569058
enriched	Pentose phosphate pathway	26	0	0.00775843
enriched	Vitamin B5 - CoA biosynthesis from pantothenate	28	0	0.00775843
depleted	Tyrosine metabolism	76	0	0.0103924
depleted	Androgen and estrogen biosynthesis and metabolism	59	0	0.0137313
enriched	Methionine and cysteine metabolism	68	0	0.0196326
enriched	Putative anti-Inflammatory metabolites formation from EPA	38	0	0.0200683
enriched	Glycosphingolipid metabolism	63	0	0.0204786
enriched	Vitamin B3 (nicotinate and nicotinamide) metabolism	37	0	0.0223126
depleted	Linoleate metabolism	51	0	0.0274534
enriched	Vitamin E metabolism	39	0	0.0274534
enriched	Selenoamino acid metabolism	31	0	0.0393765
HG19_GRCh38_-_Cytogenic_Bands
Type	Name	Number of hits	Expected score	Adjusted p-value
depleted	chr19.p12	20	0	6.73825e-07
depleted	chr3.p21.31	114	0	0.000606739
enriched	chr17.q25.1	77	0	0.00122269
enriched	chr20.p13	56	0	0.00122269
depleted	chr7.q34	40	0	0.00122269
enriched	chr17.q25.3	88	0	0.00232116
depleted	chr15.q26.2	5	0	0.00369454
enriched	chr19.p13.3	151	0	0.00369454
enriched	chr2.p23.3	53	0	0.00369454
enriched	chr11.q13.1	82	0	0.0055595
enriched	chr9.q34.11	64	0	0.0109104
depleted	chr19.q13.43	64	0	0.0143843
depleted	chr7.q36.1	56	0	0.0143843
enriched	chr16.p13.3	156	0	0.033072
PharmGKB_-_Pathways
Type	Name	Number of hits	Expected score	Adjusted p-value
depleted	Anti diabetic Drug Potassium Channel Inhibitors Pathway, Pharmacodynamics	27	0	0.000751826
depleted	Tamoxifen Pathway, Pharmacokinetics	15	0	0.00124464
depleted	Efavirenz Pathway Pharmacokinetics, Pharmacodynamics	11	0	0.00156225
depleted	Valproic Acid Pathway, Pharmacokinetics	16	0	0.00156225
depleted	Cyclophosphamide Pathway, Pharmacokinetics	5	0	0.00458853
depleted	Proton Pump Inhibitor Pathway, Pharmacodynamics	39	0	0.00458853
depleted	Sorafenib, Pharmacokinetics	5	0	0.00458853
depleted	Warfarin Pathway, Pharmacokinetics	5	0	0.00458853
depleted	Clopidogrel Pathway, Pharmacokinetics	6	0	0.00667633
depleted	Gefitinib Pathway, Pharmacokinetics	6	0	0.00667633
depleted	Carbamazepine Pathway, Pharmacokinetics	13	0	0.0089728
depleted	Sympathetic Nerve Pathway Pre and Post Ganglionic, Junction	8	0	0.0089728
depleted	Benzodiazepine Pathway, Pharmacokinetics	8	0	0.00950379
depleted	Artemisinin and Derivatives Pathway, Pharmacokinetics	4	0	0.0117604
depleted	Phenytoin Pathway, Pharmacokinetics	15	0	0.0117604
depleted	Sympathetic Nerve Pathway Neuroeffector, Junction	12	0	0.0232722
depleted	Irinotecan Pathway, Pharmacodynamics	14	0	0.0235099
depleted	Erlotinib Pathway, Pharmacokinetics	6	0	0.0371897
depleted	Proton Pump Inhibitor Pathway, Pharmacokinetics	2	0	0.0478782
ConsensusPathDB_-_PID
Type	Name	Number of hits	Expected score	Adjusted p-value
enriched	Validated targets of C-MYC transcriptional activation	73	0	3.44232e-06
enriched	PLK1 signaling events	38	0	2.67296e-05
enriched	ATR signaling pathway	34	0	4.41485e-05
enriched	Direct p53 effectors	129	0	6.87469e-05
enriched	p73 transcription factor network	74	0	7.64952e-05
enriched	FOXM1 transcription factor network	40	0	0.000153545
enriched	Fanconi anemia pathway	41	0	0.000441991
enriched	Lissencephaly gene (LIS1) in neuronal migration and development	26	0	0.0010108
enriched	Aurora B signaling	38	0	0.00111344
enriched	a6b1 and a6b4 Integrin signaling	43	0	0.00145093
enriched	BARD1 signaling events	26	0	0.00178596
depleted	FOXA2 and FOXA3 transcription factor networks	35	0	0.00262919
enriched	Alpha6 beta4 integrin-ligand interactions	11	0	0.00298736
enriched	Aurora A signaling	30	0	0.00298736
enriched	Integrin-linked kinase signaling	44	0	0.00344354
enriched	Arf1 pathway	20	0	0.00873246
enriched	Signaling events mediated by PRL	22	0	0.0107348
enriched	Beta3 integrin cell surface interactions	38	0	0.0142696
enriched	p53 pathway	51	0	0.0153565
enriched	mTOR signaling pathway	59	0	0.0174242
enriched	Ceramide signaling pathway	43	0	0.0184046
enriched	Integrins in angiogenesis	60	0	0.0189552
enriched	ErbB1 downstream signaling	98	0	0.0418265
enriched	Validated transcriptional targets of AP1 family members Fra1 and Fra2	36	0	0.0458316
miRecords_-_Predicted_targets
Type	Name	Number of hits	Expected score	Adjusted p-value
GO_-_Molecular_Function
Type	Name	Number of hits	Expected score	Adjusted p-value
enriched	structural constituent of ribosome(3)	127	0	2.14635e-27
depleted	gated channel activity(6)	207	0	1.29902e-10
enriched	translation factor activity RNA binding(6)	97	0	2.019e-10
depleted	cation channel activity(7)	192	0	3.58638e-09
enriched	helicase activity(8)	143	0	3.07744e-07
enriched	ribonucleoprotein complex binding(4)	74	0	1.0678e-06
depleted	voltage gated cation channel activity(8)	93	0	1.34957e-06
enriched	DNA dependent ATPase activity(10)	78	0	4.86459e-06
depleted	voltage gated ion channel activity(7)&voltage gated channel activity(7)	123	0	4.86459e-06
enriched	purine NTP dependent helicase activity(9)&ATP dependent helicase activity(10)	93	0	1.57802e-05
enriched	threonine type peptidase activity(6)&threonine type endopeptidase activity(7)	16	0	2.59182e-05
enriched	rRNA binding(6)	38	0	3.28534e-05
enriched	heat shock protein binding(4)	72	0	3.61352e-05
enriched	translation initiation factor activity(7)	51	0	4.3652e-05
enriched	DNA helicase activity(9)	48	0	7.10401e-05
enriched	translation elongation factor activity(7)	28	0	0.000116405
enriched	NADH dehydrogenase activity(5)	33	0	0.000248218
enriched	NADH dehydrogenase quinone activity(6)&NADH dehydrogenase ubiquinone activity(7)	33	0	0.000248218
enriched	DNA directed RNA polymerase activity(7)	39	0	0.000285419
enriched	RNA polymerase activity(6)	39	0	0.000285419
depleted	ligand gated ion channel activity(7)&ligand gated channel activity(7)	79	0	0.000429028
depleted	calcium channel activity(8)	76	0	0.000442324
enriched	chaperone binding(4)	70	0	0.000442324
enriched	metal cluster binding(3)&iron sulfur cluster binding(4)	57	0	0.000442324
enriched	ligase activity forming carbon oxygen bonds(4)&ligase activity forming aminoacyl tRNA and related compounds(5)&aminoacyl tRNA ligase activity(6)	42	0	0.000476606
enriched	snRNA binding(6)	26	0	0.000476606
enriched	single stranded DNA binding(6)	72	0	0.000532722
enriched	monosaccharide binding(4)	57	0	0.000662908
enriched	RNA helicase activity(9)	62	0	0.000744469
enriched	ATP dependent DNA helicase activity(10)	33	0	0.00082204
enriched	mRNA binding(7)	123	0	0.000843463
depleted	taste receptor activity(7)	10	0	0.00107258
depleted	phosphatidylinositol phospholipase C activity(8)	21	0	0.0011522
depleted	sodium ion transmembrane transporter activity(9)	88	0	0.0011522
enriched	damaged DNA binding(6)	60	0	0.00119469
enriched	ATP dependent RNA helicase activity(10)&RNA dependent ATPase activity(10)	60	0	0.00182659
depleted	excitatory extracellular ligand gated ion channel activity(9)	25	0	0.00191224
enriched	ubiquitin like protein ligase activity(5)	181	0	0.00218022
enriched	cis trans isomerase activity(4)	38	0	0.00222496
enriched	oxidoreductase activity acting on NAD P H quinone or similar compound as acceptor(5)	45	0	0.00273837
depleted	arachidonic acid monooxygenase activity(5)&arachidonic acid epoxygenase activity(6)	11	0	0.00285158
enriched	ubiquitin protein ligase activity(6)	179	0	0.00285158
enriched	snoRNA binding(6)	23	0	0.00292096
depleted	potassium ion transmembrane transporter activity(9)	92	0	0.00309215
enriched	structural constituent of nuclear pore(3)	13	0	0.00387703
depleted	bitter taste receptor activity(8)	9	0	0.00397387
enriched	peptidyl prolyl cis trans isomerase activity(5)	37	0	0.00422258
enriched	double stranded RNA binding(6)	54	0	0.0042365
enriched	endonuclease activity(6)	108	0	0.00484311
depleted	aromatase activity(6)	18	0	0.00553851
depleted	calcium ion transmembrane transporter activity(9)	85	0	0.0056314
depleted	extracellular ligand gated ion channel activity(8)	32	0	0.0062887
depleted	potassium channel activity(8)	73	0	0.0062887
depleted	alpha actinin binding(6)	17	0	0.00639381
enriched	4 iron 4 sulfur cluster binding(5)	39	0	0.00670286
enriched	ribonuclease activity(6)	81	0	0.00670286
depleted	phospholipase C activity(7)	23	0	0.0114866
depleted	voltage gated sodium channel activity(9)	15	0	0.0118819
enriched	tRNA binding(6)	40	0	0.0131722
enriched	SUMO activating enzyme activity(6)	2	0	0.0142597
depleted	Ras guanyl nucleotide exchange factor activity(4)	118	0	0.0165504
depleted	voltage gated calcium channel activity(9)	28	0	0.0165504
enriched	Ran GTPase binding(8)	24	0	0.0173038
enriched	misfolded protein binding(4)	13	0	0.0186058
enriched	interleukin 8 receptor binding(8)	2	0	0.019252
depleted	voltage gated potassium channel activity(9)	51	0	0.019252
enriched	oxidoreductase activity acting on NAD P H(4)	81	0	0.0196513
depleted	actinin binding(5)	22	0	0.0200755
depleted	oxidoreductase activity acting on paired donors with incorporation or reduction of molecular oxygen reduced flavin or flavoprotein as one donor and incorporation of one atom of oxygen(5)	22	0	0.0200755
enriched	deoxyribonuclease activity(6)	58	0	0.0210786
enriched	ribosome binding(5)	38	0	0.0221085
enriched	ubiquitin like protein binding(4)	95	0	0.0238907
enriched	oxidoreductase activity acting on a sulfur group of donors(4)	45	0	0.0242393
enriched	procollagen proline 4 dioxygenase activity(8)	4	0	0.0262037
enriched	proteasome binding(5)	14	0	0.0276378
depleted	high density lipoprotein particle receptor binding(6)	2	0	0.0289355
enriched	nucleosomal DNA binding(6)	25	0	0.0289355
enriched	ubiquitin binding(5)	80	0	0.0289355
enriched	exonuclease activity active with either ribo or deoxyribonucleic acids and producing 5 phosphomonoesters(7)	43	0	0.0306536
depleted	glutamate receptor activity(6)	13	0	0.0306536
depleted	neurotransmitter receptor activity(5)	29	0	0.0312644
enriched	structural constituent of cytoskeleton(3)	72	0	0.0312644
enriched	hydrogen ion transmembrane transporter activity(9)	67	0	0.0333038
enriched	p53 binding(4)	60	0	0.0358503
enriched	ribosomal small subunit binding(5)	10	0	0.0400356
enriched	3 5 DNA helicase activity(10)	9	0	0.0404254
depleted	calcium release channel activity(8)	16	0	0.0404254
enriched	RNA cap binding(6)	10	0	0.0423489
depleted	guanyl nucleotide exchange factor activity(3)	173	0	0.0423489
enriched	structure specific DNA binding(6)	94	0	0.0423489
enriched	protein transporter activity(4)	87	0	0.043865
enriched	ubiquitin like protein conjugating enzyme activity(5)	26	0	0.0452114
enriched	GDP dissociation inhibitor activity(6)	9	0	0.0474619
enriched	adenyl nucleotide exchange factor activity(6)	5	0	0.0474619
enriched	NF kappaB binding(5)	27	0	0.0478066
enriched	disulfide oxidoreductase activity(5)	26	0	0.0499443
depleted	intracellular ligand gated ion channel activity(8)	18	0	0.0499443
TRANSFAC_-_Transcription_factor_complexes_-_Validated_targets
Type	Name	Number of hits	Expected score	Adjusted p-value
depleted	RXR-alpha:CAR	4	0	0.0283634
ConsensusPathDB_-_BioCarta
Type	Name	Number of hits	Expected score	Adjusted p-value
enriched	proteasome complex	22	0	2.07337e-13
enriched	y branching of actin filaments	14	0	0.00540683
enriched	how does salmonella hijack a cell	10	0	0.0391914
enriched	eukaryotic protein translation	12	0	0.0465646
HG19_GRCh37_-_Chromosome
Type	Name	Number of hits	Expected score	Adjusted p-value
enriched	chr20	401	0	4.45918e-06
depleted	chr13	241	0	1.22775e-05
depleted	chrY	30	0	0.000990967
[truncated: 388 more rows]
