# Supplementary material for: SUMO pathway inhibition targets an aggressive pancreatic cancer subtype
Source: PubMed Central journal article supplement — Gut. 2020 Jan 30;69(8):1472–82. doi: 10.1136/gutjnl-2018-317856 (PMC7398468; doi:10.1136/gutjnl-2018-317856), 2020-01-30

**A** HALLMARK\_MYC\_TARGETS\_V1 **B**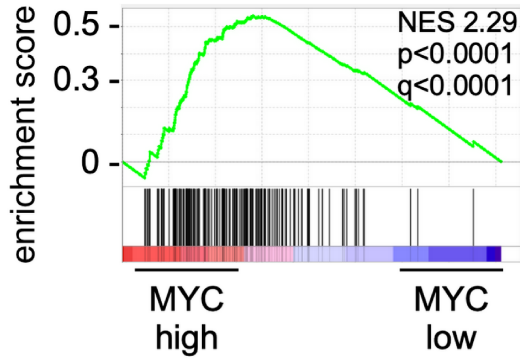

## HALLMARK\_MYC\_TARGETS\_V2

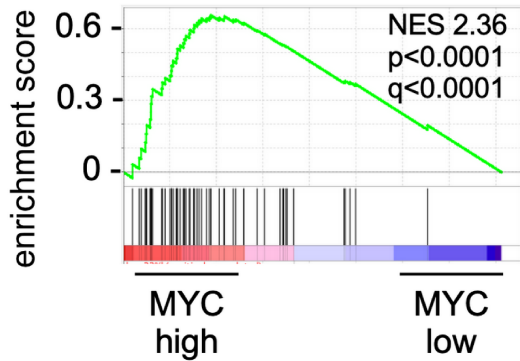

HALLMARK\_SIGNATURES  
associated with GI<sub>50</sub> negative  
correlated genes

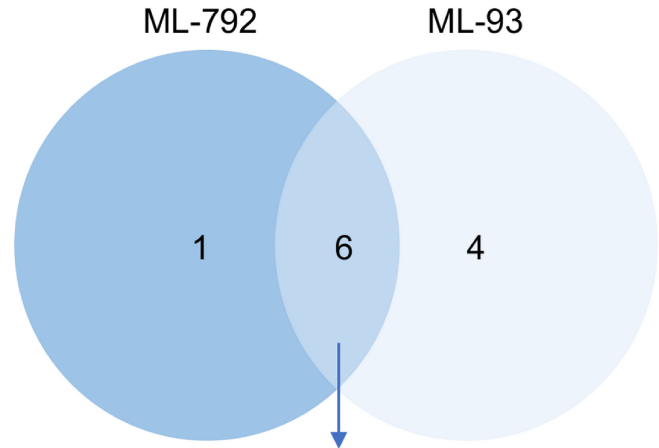

HALLMARK\_MYC\_TARGETS\_V1  
HALLMARK\_MYC\_TARGETS\_V2  
HALLMARK\_CHOLESTEROL\_HOMEOSTASIS  
HALLMARK\_MTORC1\_SIGNALING  
HALLMARK\_OXIDATIVE\_PHOSPHORYLATION  
HALLMARK\_FATTY\_ACID\_METABOLISM

**C** HALLMARK\_MYC\_TARGETS\_V1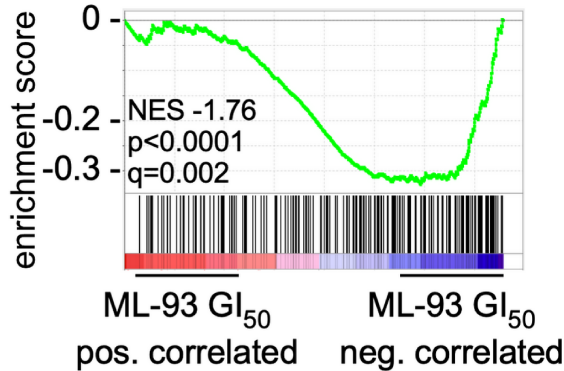

## HALLMARK\_MYC\_TARGETS\_V1

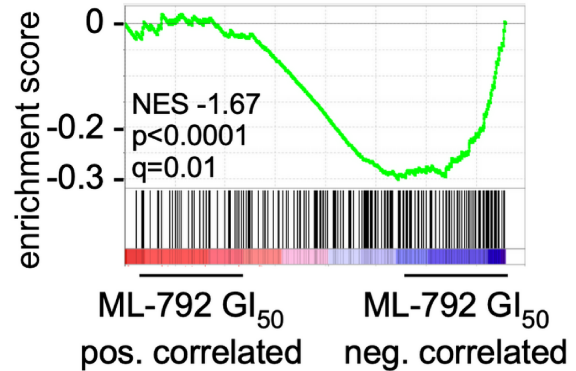

## HALLMARK\_MYC\_TARGETS\_V2

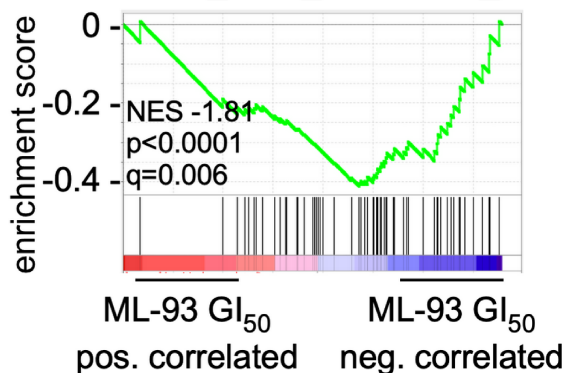

## HALLMARK\_MYC\_TARGETS\_V2

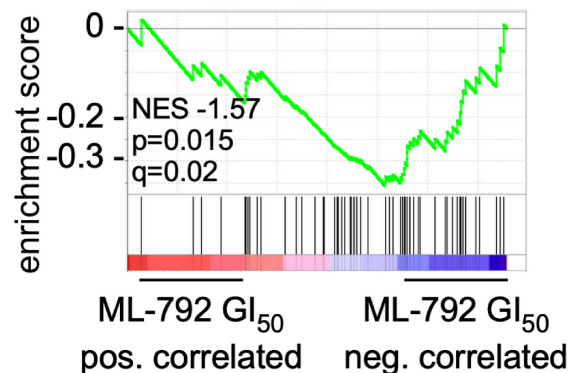

Supplement: gutjnl-2018-317856supp011.pdf [file gutjnl-2018-317856supp011.pdf]
