# Supplementary figures and images for: SUMO pathway inhibition targets an aggressive pancreatic cancer subtype
Source: PubMed Central journal article supplement — Gut. 2020 Jan 30;69(8):1472–82. doi: 10.1136/gutjnl-2018-317856 (PMC7398468; doi:10.1136/gutjnl-2018-317856), 2020-01-30

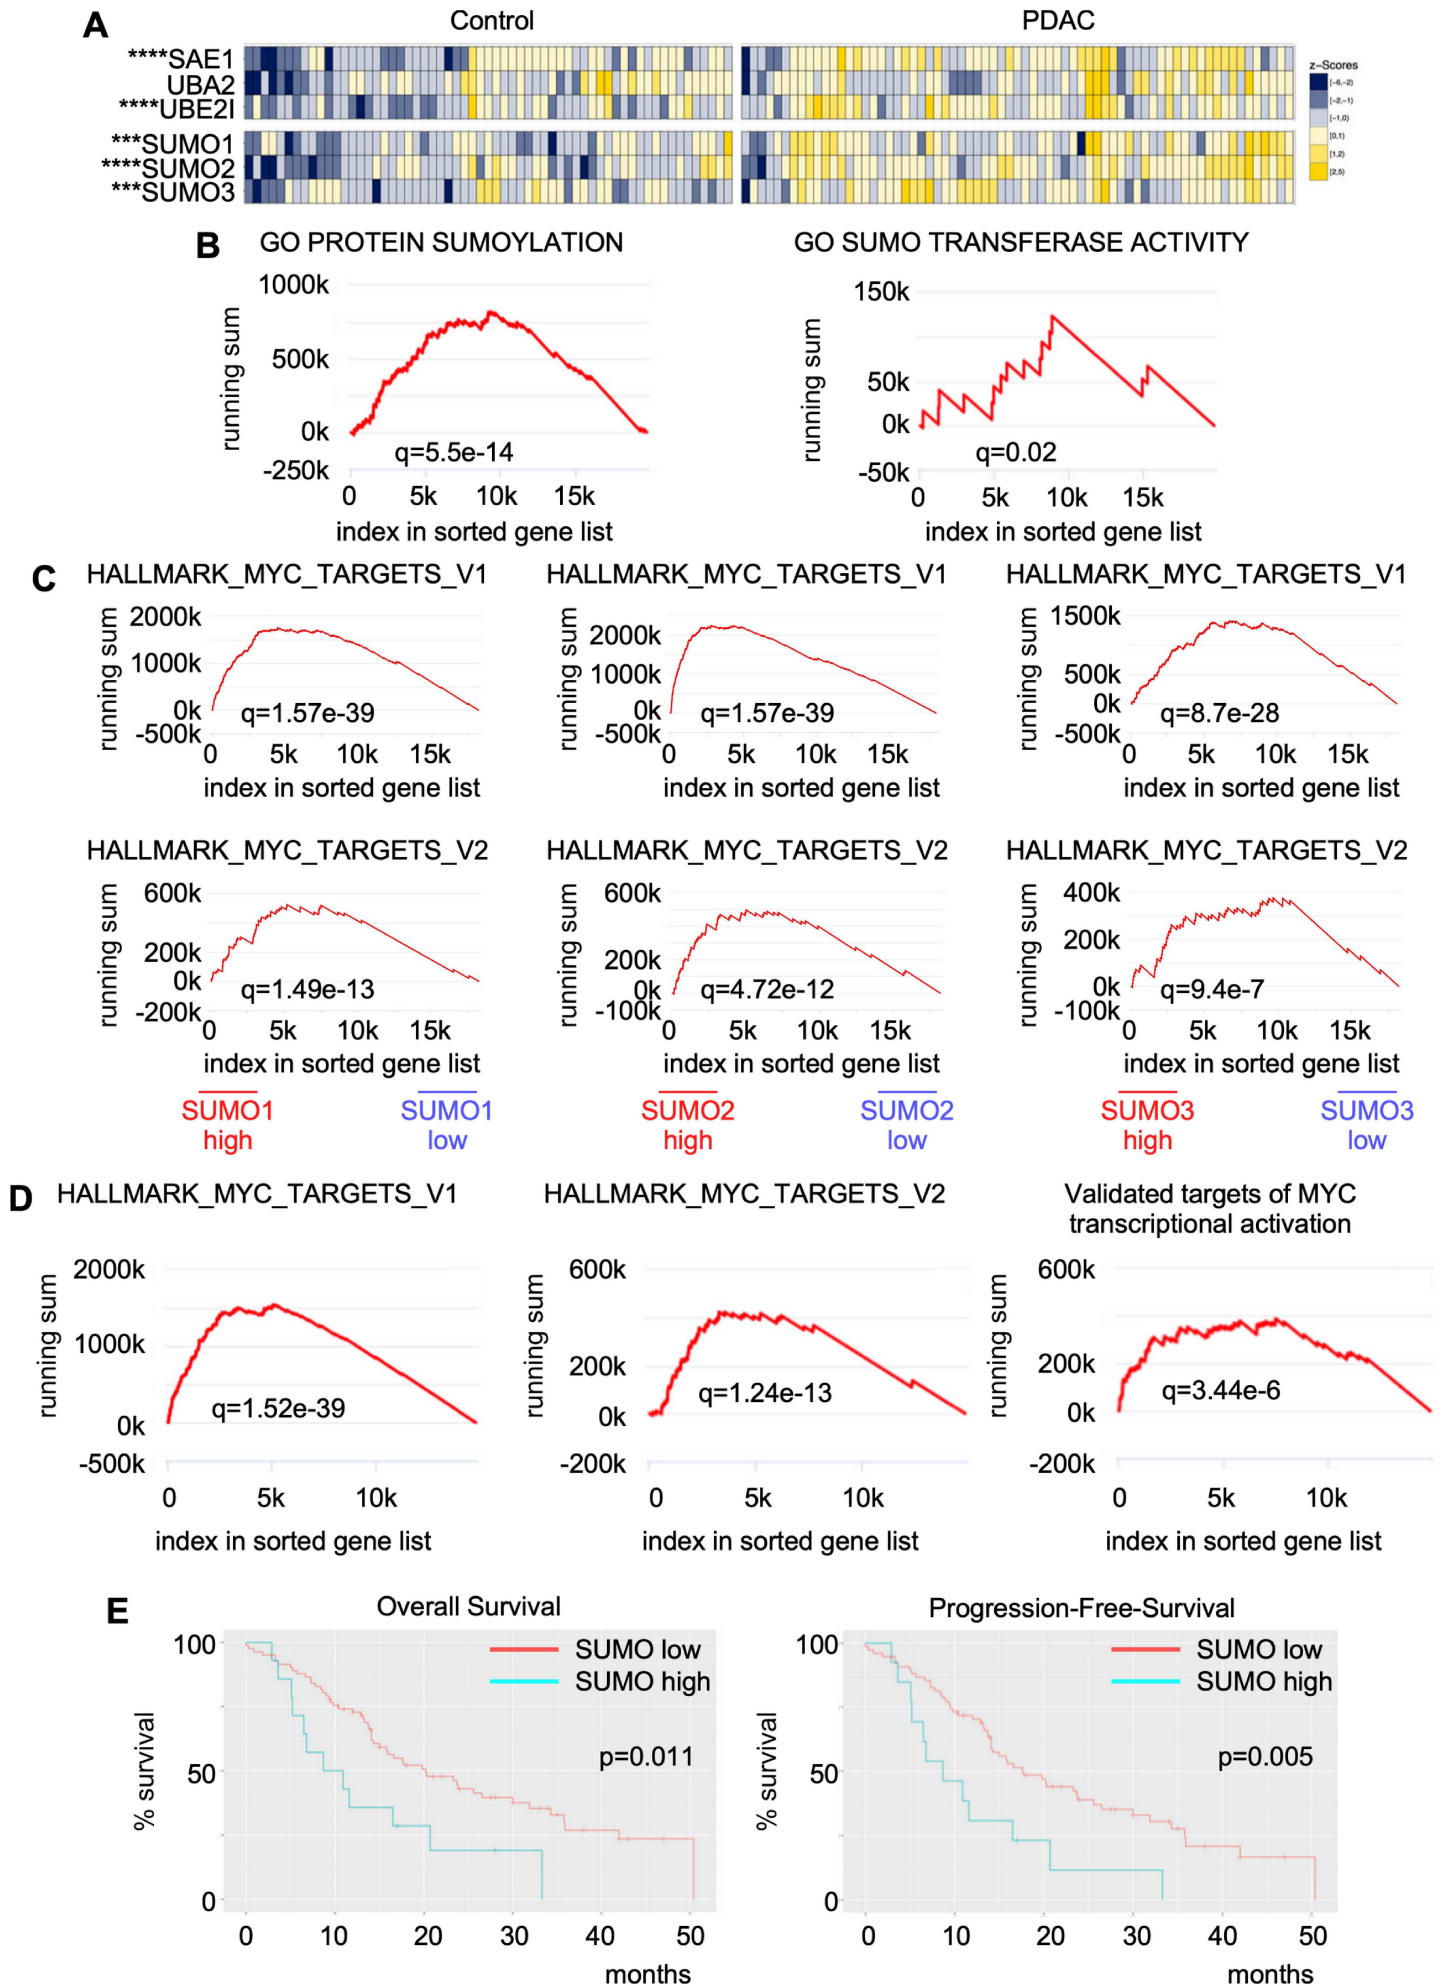

Supplement: gutjnl-2018-317856supp004.pdf [file gutjnl-2018-317856supp004.pdf]

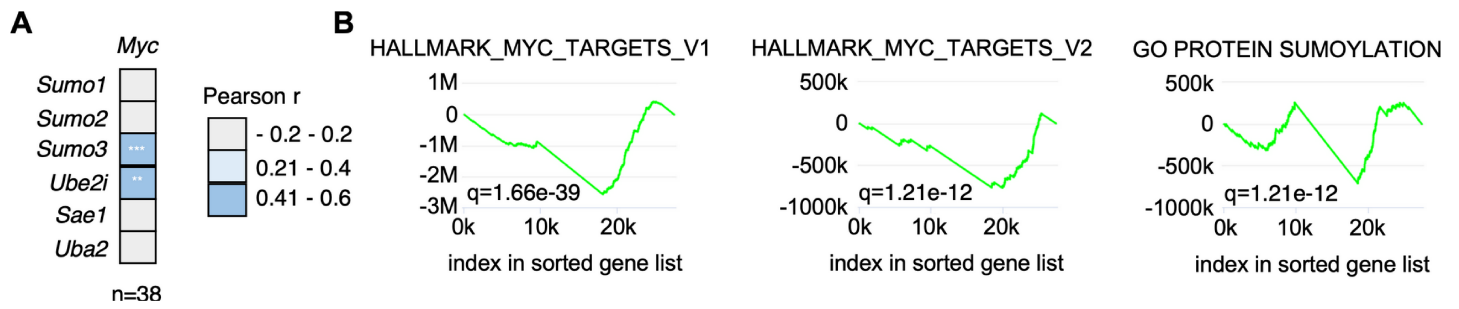

Supplement: gutjnl-2018-317856supp007.pdf [file gutjnl-2018-317856supp007.pdf]

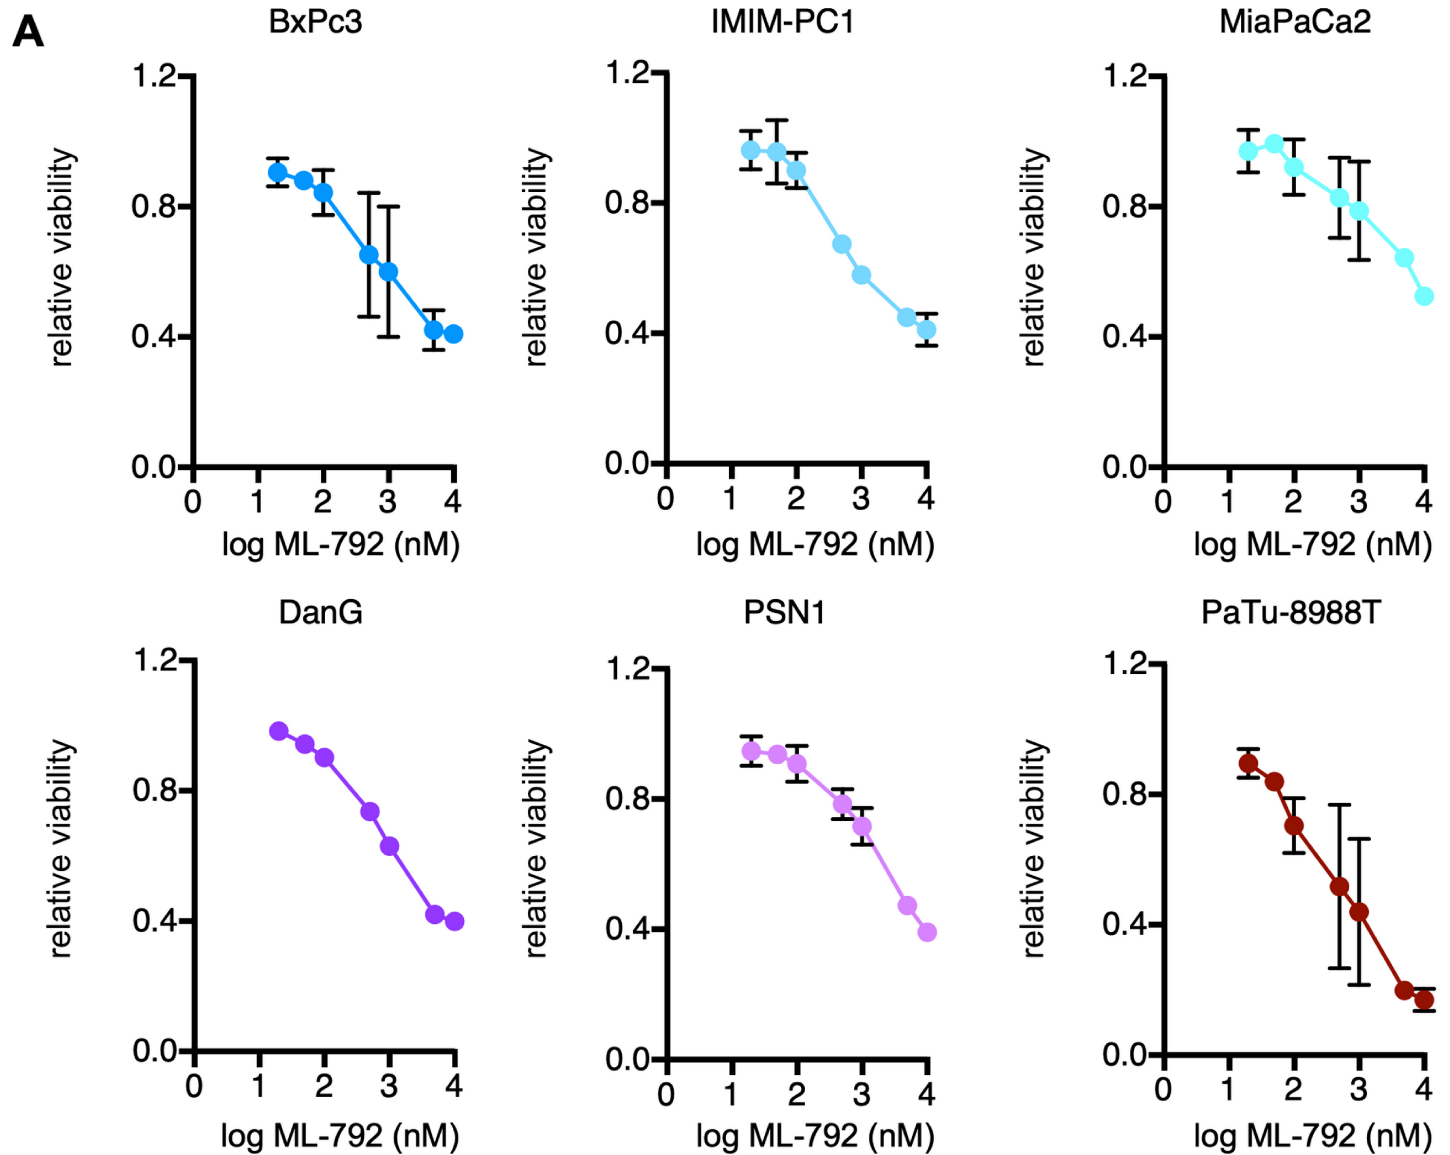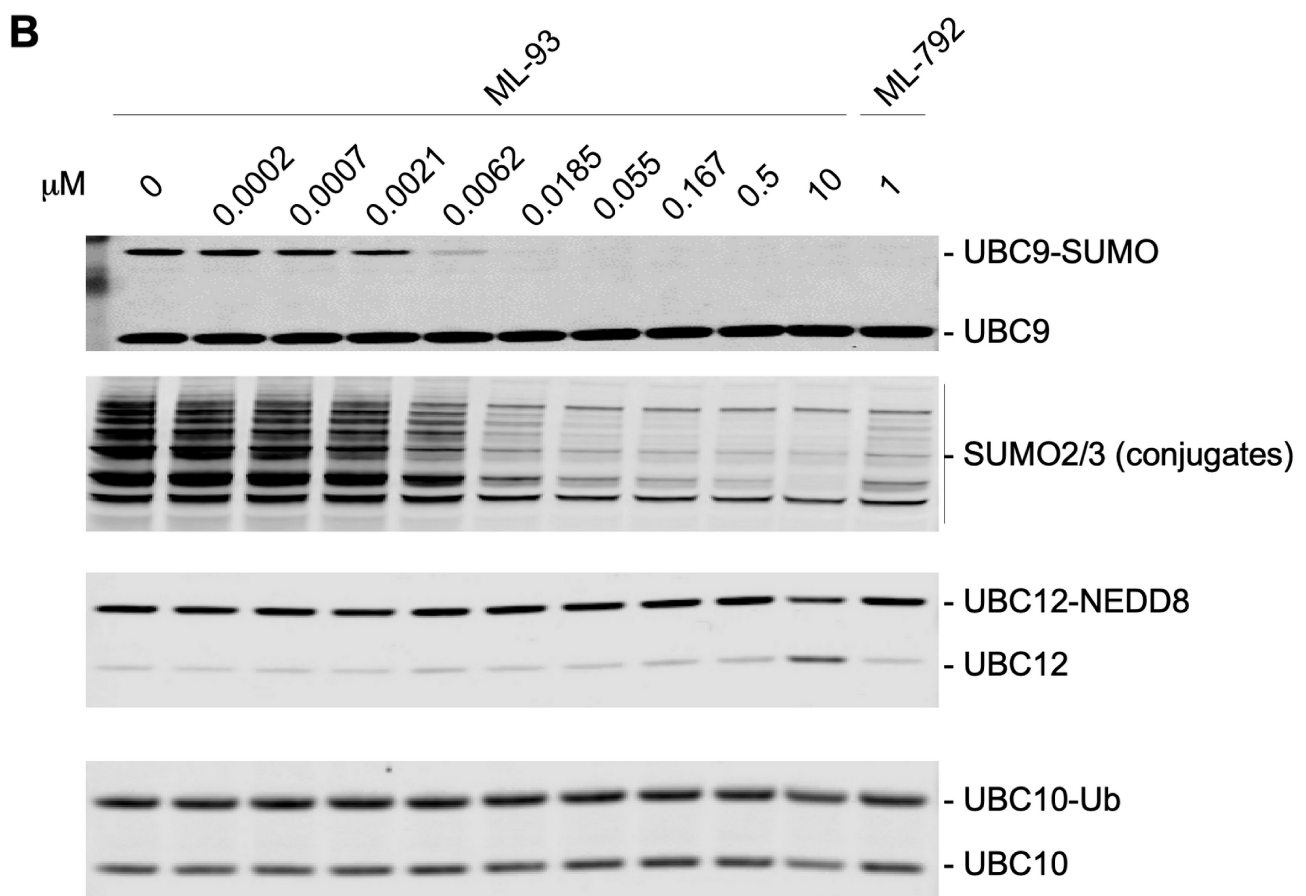

Supplement: gutjnl-2018-317856supp008.pdf [file gutjnl-2018-317856supp008.pdf]

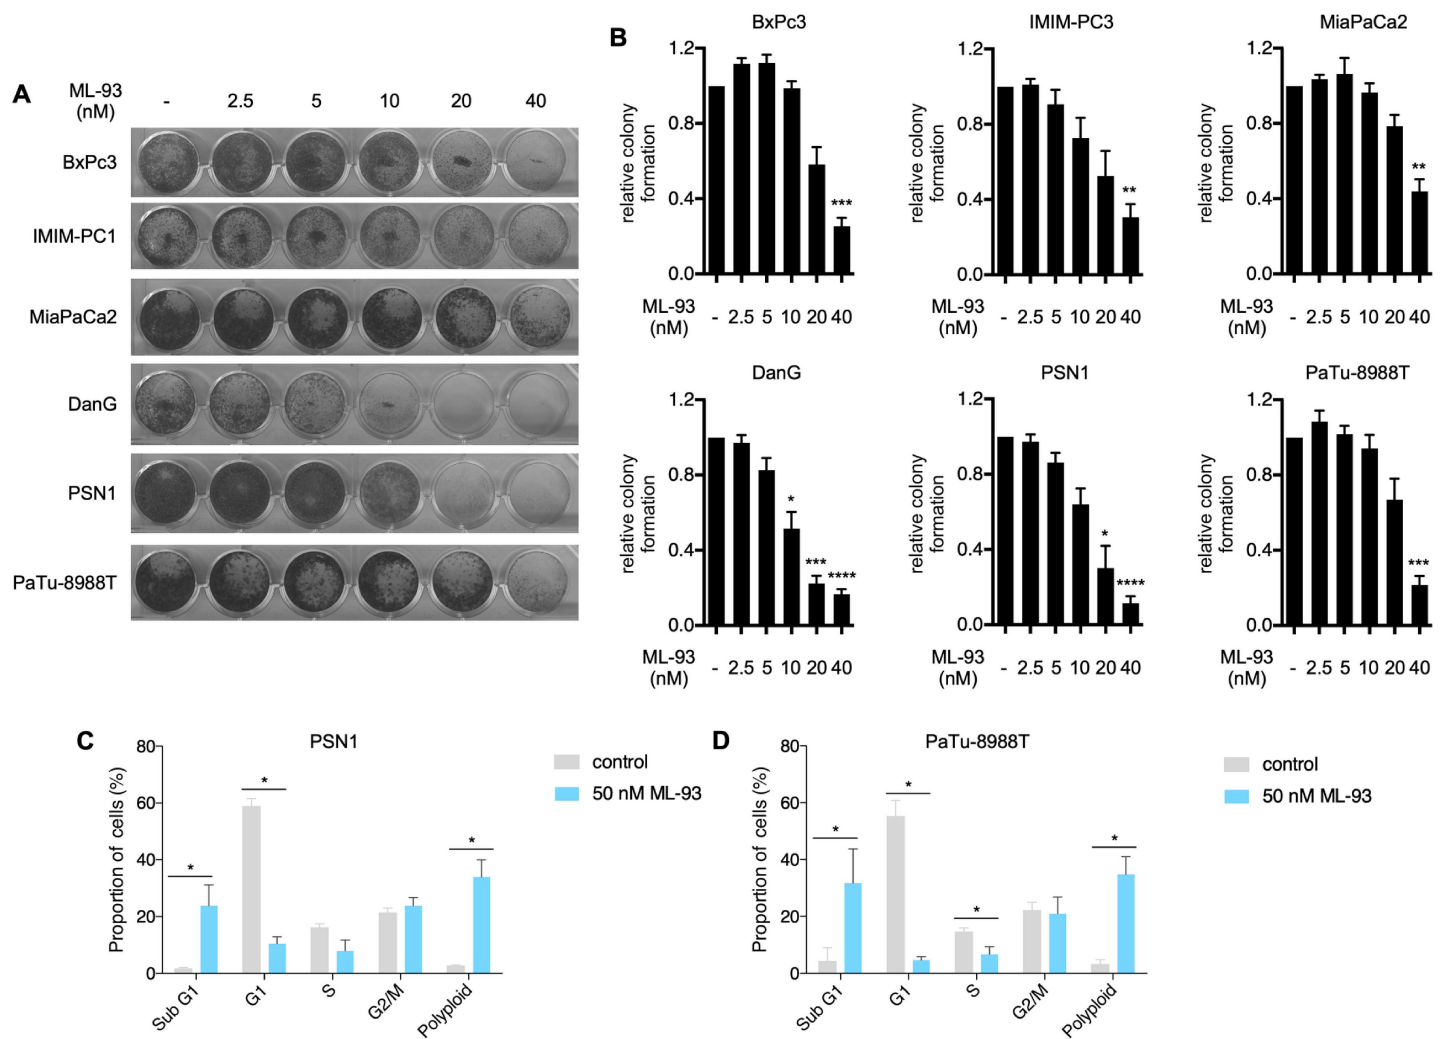

Supplement: gutjnl-2018-317856supp009.pdf [file gutjnl-2018-317856supp009.pdf]

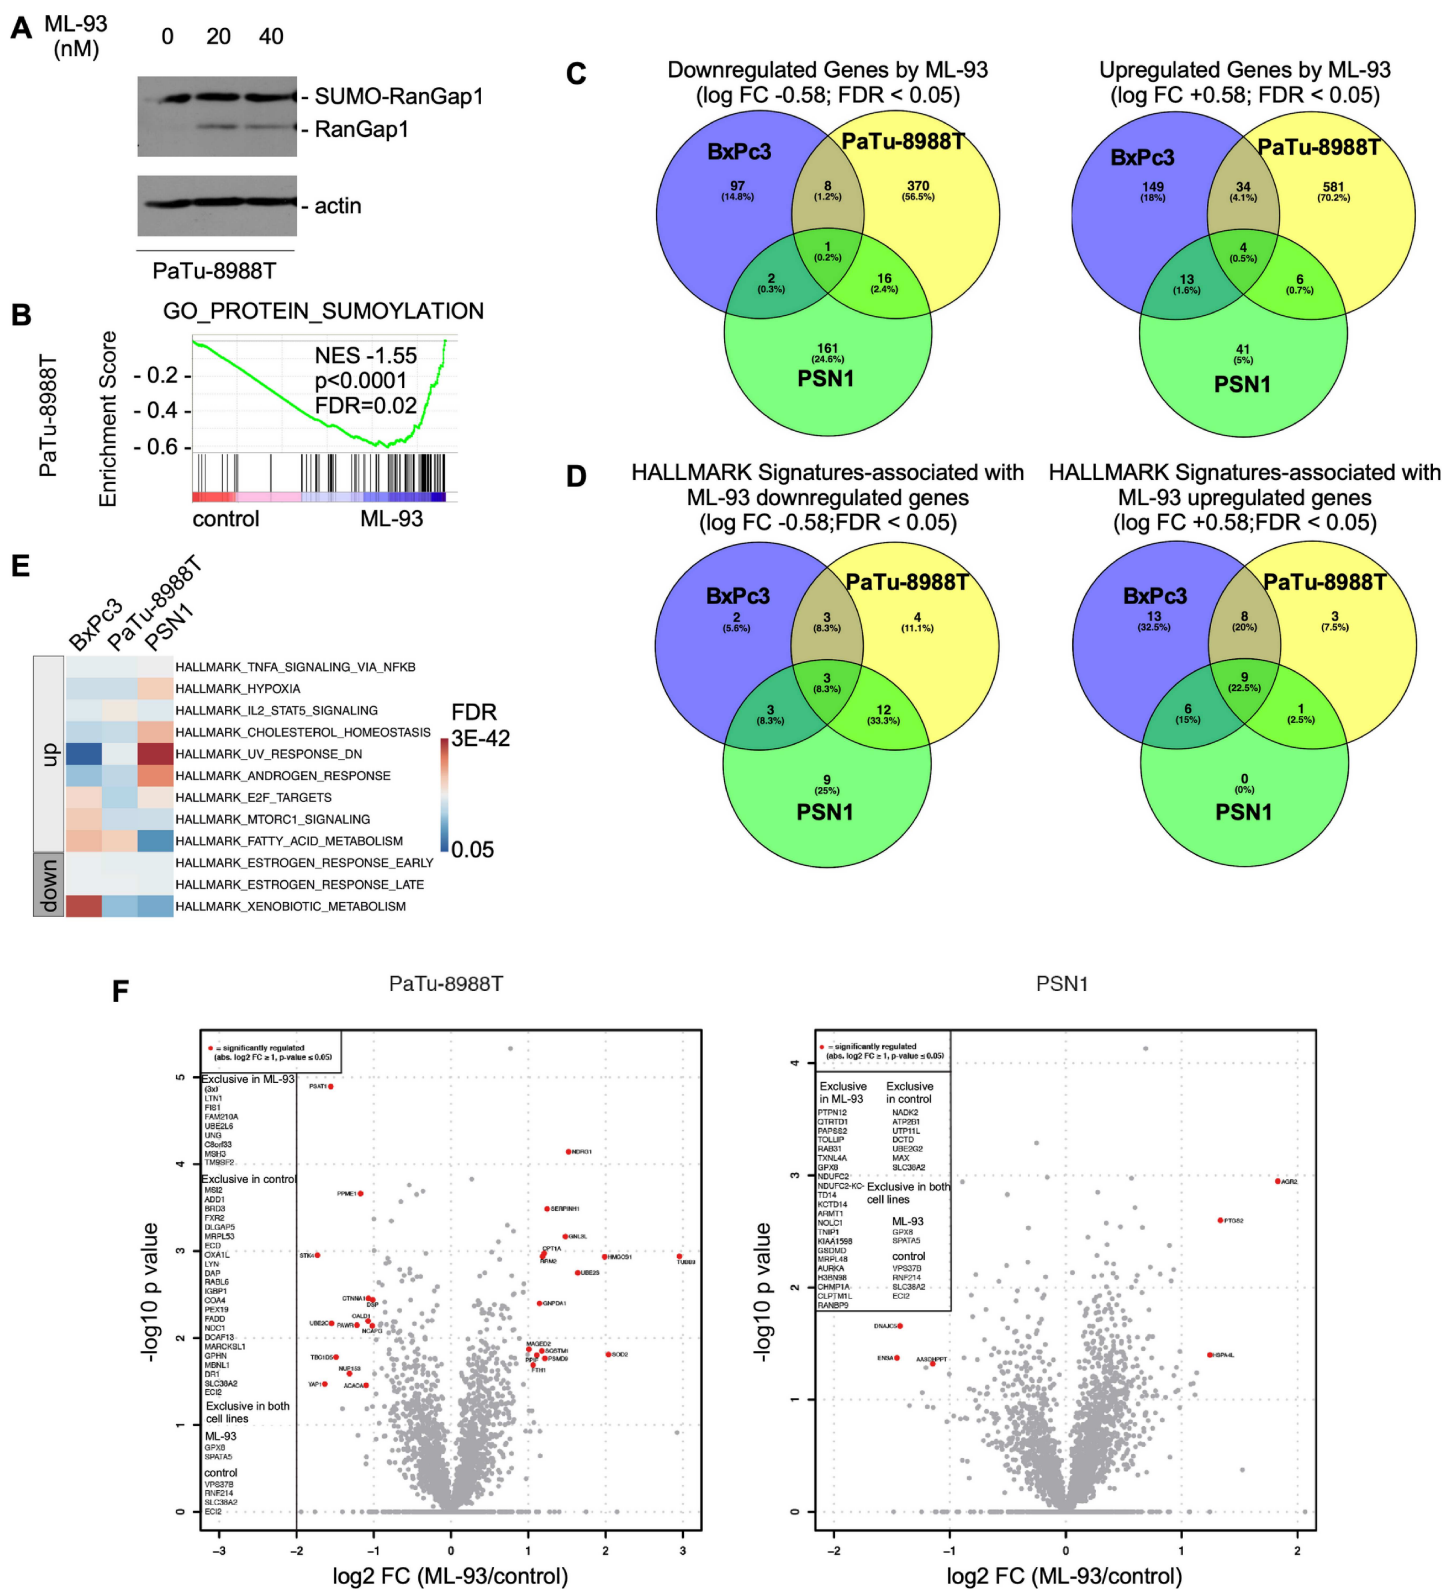

Supplement: gutjnl-2018-317856supp010.pdf [file gutjnl-2018-317856supp010.pdf]

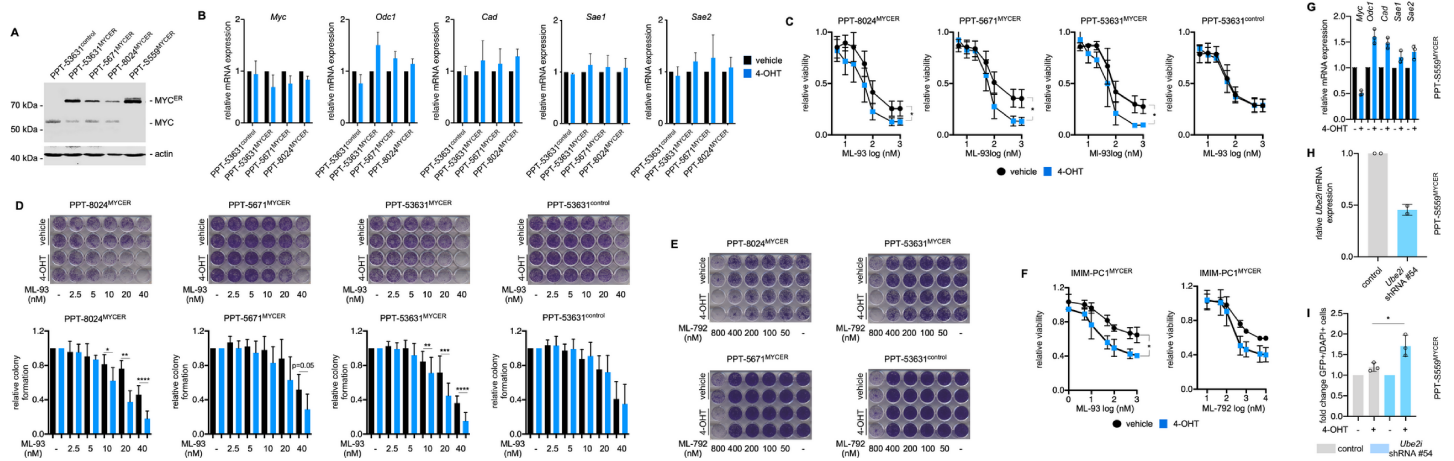

Supplement: gutjnl-2018-317856supp012.pdf [file gutjnl-2018-317856supp012.pdf]

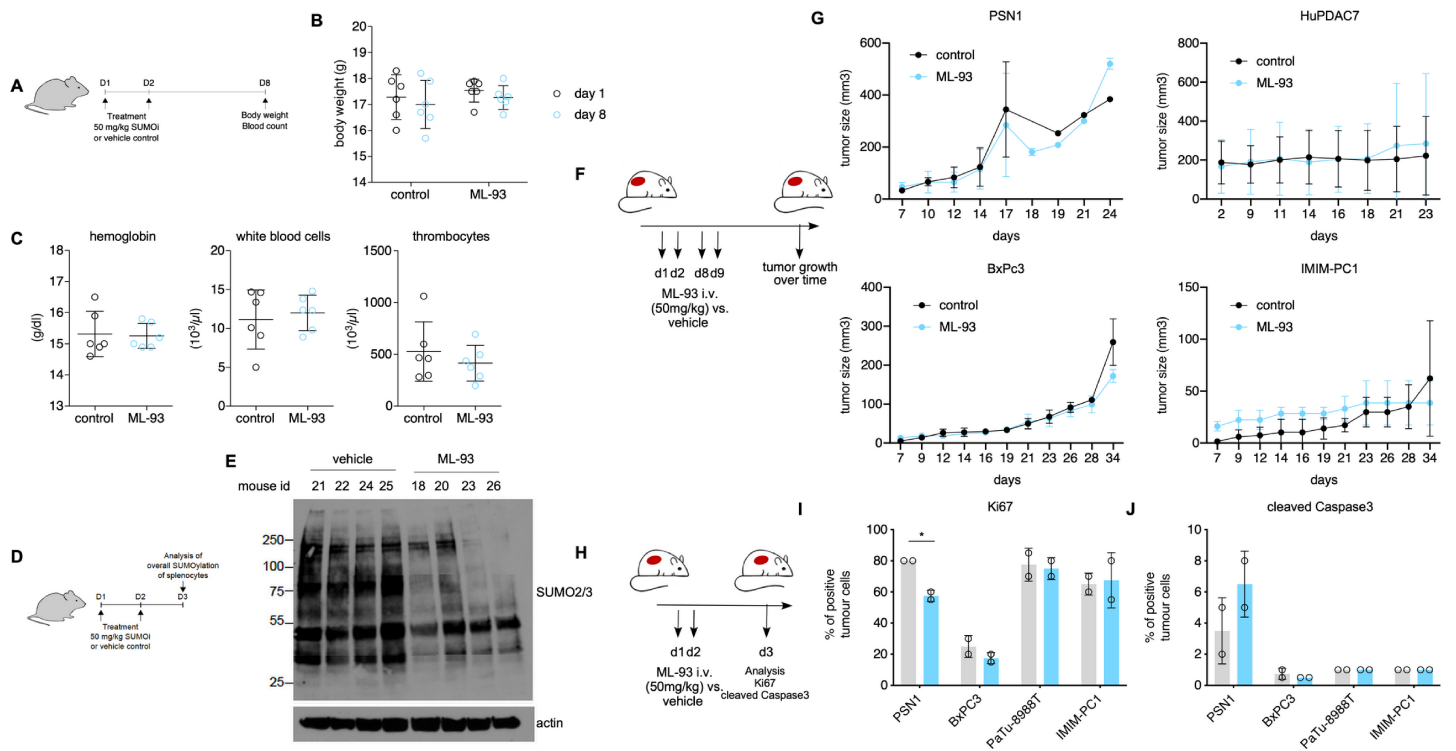

Supplement: gutjnl-2018-317856supp013.pdf [file gutjnl-2018-317856supp013.pdf]

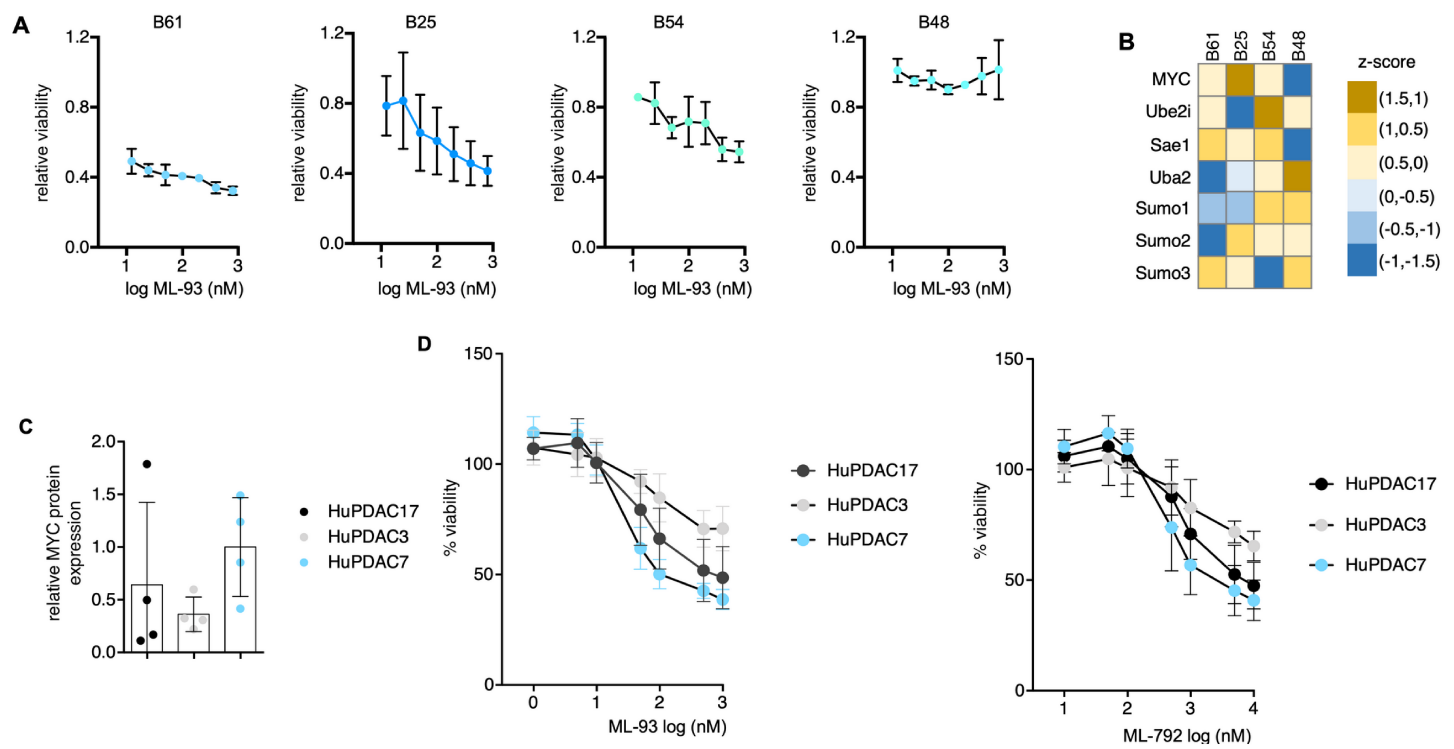

Supplement: gutjnl-2018-317856supp014.pdf [file gutjnl-2018-317856supp014.pdf]
